1 **Single-cell transcriptional atlas of the Chinese horseshoe bat**  
2 **(*Rhinolophus sinicus*) provides insight into the cellular**  
3 **mechanisms which enable bats to be viral reservoirs**

4  
5 Lili Ren,<sup>1,2,#</sup> Chao Wu,<sup>1,2,#</sup> Li Guo,<sup>1,2,#</sup> Jiacheng Yao,<sup>3,#</sup> Conghui Wang,<sup>1</sup> Yan Xiao,<sup>1,2</sup>  
6 Angela Oliveira Pisco,<sup>4</sup> Zhiqiang Wu,<sup>2,5</sup> Xiaobo Lei,<sup>1</sup> Yiwei Liu,<sup>1</sup> Leisheng Shi,<sup>6</sup> Lianlian  
7 Han,<sup>1</sup> Hu Zhang,<sup>1</sup> Xia Xiao,<sup>1</sup> Jingchuan Zhong,<sup>1</sup> Hongping Wu,<sup>3</sup> Mingkun Li,<sup>6,7</sup> Stephen  
8 R. Quake,<sup>4,8</sup> Yanyi Huang,<sup>9,10,\*</sup> Jianbin Wang,<sup>3,11,12,\*</sup> and Jianwei Wang,<sup>1,2,\*</sup>

9  
10 <sup>1</sup> NHC Key Laboratory of Systems Biology of Pathogens and Christophe Mérieux  
11 Laboratory, Institute of Pathogen Biology, Chinese Academy of Medical Sciences &  
12 Peking Union Medical College, Beijing 100730, China

13 <sup>2</sup> Key Laboratory of Respiratory Disease Pathogenomics, Chinese Academy of Medical  
14 Sciences and Peking Union Medical College, Beijing, 100730, China

15 <sup>3</sup> School of Life Sciences, Tsinghua-Peking Center for Life Sciences, Tsinghua  
16 University, Beijing 100084, China

17 <sup>4</sup> Chan Zuckerberg Biohub, San Francisco, CA 94158, USA

18 <sup>5</sup> NHC Key Laboratory of Systems Biology of Pathogens, Institute of Pathogen Biology,  
19 Chinese Academy of Medical Sciences & Peking Union Medical College, Beijing 100730,  
20 China

21 <sup>6</sup> Beijing Institute of Genomics, Chinese Academy of Sciences, and China National  
22 Center for Bioinformation, Beijing, 100101, China

23 <sup>7</sup> Center for Excellence in Animal Evolution and Genetics, Chinese Academy of Sciences,  
24 Kunming, 650223, China

25 <sup>8</sup> Departments of Bioengineering and Applied Physics, Stanford University, Stanford, CA  
26 94305, USA

27 <sup>9</sup> Biomedical Pioneering Innovation Center (BIOPIC), Beijing Advanced Innovation  
28 Center for Genomics (ICG), College of Chemistry, and Peking-Tsinghua Center for Life  
29 Sciences, Peking University, Beijing 100871, China

30 <sup>10</sup> Institute for Cell Analysis, Shenzhen Bay Laboratory, Guangdong 518132, China

31 <sup>11</sup> Beijing Advanced Innovation Center for Structural Biology (ICSB), Tsinghua  
32 University, Beijing 100084, China

33 <sup>12</sup> Chinese Institute for Brain Research (CIBR), Beijing 102206, China

34 <sup>#</sup> These authors contributed equally.

35 <sup>\*</sup> Correspondence: [jianwei.wang@ipbcams.ac.cn](mailto:jianwei.wang@ipbcams.ac.cn) (Jianwei W.),  
36 [jianbinwang@tsinghua.edu.cn](mailto:jianbinwang@tsinghua.edu.cn) (Jianbin W.), [yanyi@pku.edu.cn](mailto:yanyi@pku.edu.cn) (Y.H.)

37

38

39 **Abstract**

40 Bats are a major “viral reservoir” in nature and there is a great interest in not only the  
41 cell biology of their innate and adaptive immune systems, but also in the expression  
42 patterns of receptors used for cellular entry by viruses with potential cross-species  
43 transmission. To address this and other questions, we created a single-cell transcriptomic  
44 atlas of the Chinese horseshoe bat (*Rhinolophus sinicus*) which comprises 82,924 cells  
45 from 19 organs and tissues. This atlas provides a molecular characterization of numerous  
46 cell types from a variety of anatomical sites, and we used it to identify clusters of  
47 transcription features that define cell types across all of the surveyed organs. Analysis of  
48 viral entry receptor genes for known zoonotic viruses showed cell distribution patterns  
49 similar to that of humans, with higher expression levels in bat intestine epithelial cells. In  
50 terms of the immune system, CD8<sup>+</sup> T cells are in high proportion with tissue-resident  
51 memory T cells, and long-lived effector memory nature killer (NK) T-like cells (*KLRG1*,  
52 *GZMA* and *ITGA4* genes) are broadly distributed across the organs. Isolated lung primary  
53 bat pulmonary fibroblast (BPF) cells were used to evaluate innate immunity, and they  
54 showed a weak response to interferon  $\beta$  and tumor necrosis factor- $\alpha$  compared to their  
55 human counterparts, consistent with our transcriptional analysis. This compendium of  
56 transcriptome data provides a molecular foundation for understanding the cell identities,  
57 functions and cellular receptor characteristics for viral reservoirs and zoonotic  
58 transmission.

59

60 **Key words:** bat, single-cell sequencing, immunity, receptor, zoonotic

61

## 62 **Introduction**

63 Bats function as natural viral reservoirs and are distributed globally; they are unique  
64 as flying mammals. They have high diversity with more than 1,300 bat species having  
65 been identified [<http://www.batcon.org>]<sup>1,2</sup>. Bats carry some of the deadliest viruses for  
66 humans, including lyssaviruses, Ebola (EBOV) and Marburg (MARV) filoviruses, severe  
67 acute respiratory syndrome coronaviruses (SARS-CoV)-like viruses (SL-CoVs), Middle  
68 East respiratory syndrome (MERS-CoV)-like viruses (ML-CoVs), Hendra (HeV) and  
69 Nipah (NiV) henipaviruses<sup>3,4</sup>. SARS-CoV-2, which emerged in December 2019 and  
70 caused a global pandemic, is also considered as originating in bats<sup>5,6</sup>.

71 Bats have evolved over eons to sustain infection from pathogens without  
72 succumbing to overt disease, which indicates a uniquely powerful immune system<sup>7</sup>.  
73 According to the comparative genome and transcriptome studies, *in vitro* bat cell culture,  
74 and experimental infection assays, the diverse bat species may have evolved different  
75 mechanisms to balance between enhanced immune function which clears viral infections  
76 and tolerance on limiting immunopathology<sup>1,8</sup>. However, knowledge of bat immunology  
77 is still poorly understood as current studies used mainly *Pteropus alecto*, *Myotis davidii*,  
78 and *Rousettus aegyptiacus* species, but obtained conflicting findings on the function of  
79 bat immune systems<sup>9,10</sup>. The natural killer (NK) cells and type I interferons (IFNs)  
80 signaling pathways are of great interest. It has been reported a few NK cell receptor genes,  
81 killer cell lectin-like receptor genes (*KLRD* and *KLRC*), exist in the *Pteropus alecto*  
82 transcriptome and *Rousettus aegyptiacus* genome<sup>11</sup>. However, the majority of known  
83 canonical NK cell receptor genes are absent in currently known bat genomes<sup>10,12</sup>.

84 As they have a long life span and continued natural selection, the bat has also been



85 considered as an excellent model to study human cellular evolution features compared to  
86 other lab animals<sup>1</sup>. Characterizing the extent to which bat cellular biological functions  
87 mirrors those of humans will enable scientists to understand the characteristics of the  
88 immune system and mechanisms of the zoonotic virus spreading. The exploration of the  
89 organs in single cell level in human, model mouse has provided insights into cellular  
90 diversity and revealed new cell types related to physiological function<sup>13-15</sup>.

91 In this study we report the molecular composition of 89 cell types from the Chinese  
92 horseshoe bat (*Rhinolophus sinicus*), belonging to suborder of *Yinpterochiroptera*, a  
93 natural reservoir of SL-CoVs. The compendium comprises single-cell transcriptomic data  
94 from cells of 19 organs, including adipose tissues (brown and white), bladder, bone  
95 marrow, brain, heart, intestine, kidney, liver, lung, muscle, pancreas, wing membrane,  
96 spleen, testis, thymus, tongue, trachea and whole blood.

97

## 98 **Results**

### 99 **Transcriptomic characteristics**

100 To ensure accuracy of the single cell sequencing (sc-seq), 12 of the 19 obtained  
101 organs were firstly analyzed by using bulk sequencing (bulk-seq), including adipose  
102 tissues (brown and white), brain, heart, intestine, kidney, liver, lung, muscle, spleen,  
103 tongue, and trachea (Fig. 1a). As the interaction of the virus with its cellular receptor is a  
104 key step in its pathogenesis<sup>16</sup>, we first compared the transcriptomic patterns of viral  
105 receptor genes in different mammals: bat, human and mouse. We analyzed 6 out of 28  
106 known human viral receptor genes as representatives (Fig. 1b), in which five are known  
107 bat zoonotic virus receptors: angiotensin convert enzyme 2 (ACE2) (receptor of

108 SARS-CoV, SARS-CoV-2 and human coronavirus (HCoV) NL63), dipeptidyl peptidase 4  
109 (DPP4), (receptor of MERS-CoV), aminopeptidase N (ANPEP) (receptor of  
110 HCoV-229E)<sup>17</sup>, Ephrin-B2 (EFNB2) (receptor of HeV and NiV), NPC intracellular  
111 cholesterol transporter 1 (NPC1) (receptor of EBOV and MARV), coxsackievirus and  
112 adenovirus receptor [CXADR, the human and bat adenovirus (Adv) shared receptor]<sup>18</sup>.  
113 Transmembrane serine protease 2 (TMPRSS2), a protease essential for SARS-CoV and  
114 SARS-CoV-2 entry was also analyzed (Fig. 1b). The data show that *TMPRSS2*, *DPP4*  
115 and *ANPEP* express at high levels in the lung, intestine and kidney in bat, human and  
116 mouse. Although *ACE2* is also highly expressed in the intestine and kidney of all three  
117 species, for lung it expresses highly in only mouse but not in human or bat (Fig. 1b, 1c).  
118 Both the *ACE2* and *TMPRSS2* genes highly express in bat tongue, while only *ACE2*  
119 highly expresses in mouse tongue and only *TMPRSS2* in human tongue. In the heart,  
120 brain, spleen, wing (skin), muscle and adipose tissues, only *ACE2* shows highly  
121 expressed in two of the species, but *TMPRSS2* shows low expression levels. The neural  
122 cell adhesion molecule 1 (NCAM1) gene, Rabies virus (RABV) receptor, is found mainly  
123 expressed in the brain of all three species, as well as in the human heart, spleen and  
124 muscle. The EFNB2 and NPC1 are distributed in most of the organs in bat, human and  
125 mouse with similar expression level. Such distribution characteristics may be related to  
126 the multiple organs involved infections of HeV, NiV and EBOV<sup>19,20</sup>. Of the other 20 viral  
127 receptor genes, we notice that most of the genes express in a similar patterns between bat  
128 and human, except the low-density lipoprotein receptor (*LDLR*) gene, the receptor gene  
129 of human rhinovirus, which shows a low expression level in bat intestine and lung  
130 compared to that of human (Extended Data Fig. 1a). Therefore, at the level of bulk

131 transcriptomic analysis, it is clear that the ability of bats to avoid overt disease from these  
132 viruses is not due to species specific expression of entry receptors in particular tissues.

### 133 **Construction of single-cell atlas of bat**

134 For sc-seq, nearly all tissues were obtained from both bats, with the exception of the  
135 intestine and white adipose tissue (Fig. 1a). Overall, 82,924 cells were retained after  
136 quality control. The median number of unique molecular identifiers (UMIs) per cell is  
137 3,081 (Extended Data Fig. 1b). The organs were analyzed independently and cells were  
138 clustered according to the highly variable genes between cells by principal component  
139 analysis (PCA) and nearest-neighbour graph. A total of the 182 clusters were defined  
140 from the 19 organs (Extended Data Fig. 1c, Supplementary Table 1). The cell types in  
141 each cluster were annotated using known genes with differential expression between  
142 clusters. Significant differential transcriptional genes were observed across cell types,  
143 which encompass the gene module repertoire of the bat (Fig. 1d, 1e, Extended Data Fig.  
144 1c). To ensure the accuracy of the single-cell (sc)-RNA seq data for cell typing, we  
145 further analyzed these differential transcriptional genes and found the similar expression  
146 pattern in corresponding organs in the bulk-seq data (Extended Data Fig. 1d). We  
147 constructed a bat cell atlas (<http://bat.big.ac.cn/>) for data accessing, enabling the  
148 searching of interested genes and browsing of single-cell data for all the organs.

149 To define whether there are varying gene transcription levels in different species at  
150 the single cell level, we explored differential gene expression by using the data from the  
151 bat lung and compared to that of human and mouse. In the bat lung, total 19 distinct  
152 clusters were classified, including 4 epithelial cells [alveolar epithelial type 1 (AT1) cell,  
153 alveolar epithelial type 2 (AT2) cell, ciliated cell, and mesothelial cell)], 3 endothelial

154 cells (capillary type 1 cell, capillary type 2 cell, and lymphatic cell), 3 mesenchymal cells  
155 (adventitial fibroblast, alveolar fibroblast, and myofibroblast), 9 immune cell types  
156 (alveolar macrophage, interstitial macrophage, classical monocyte, non-classical  
157 monocyte, B cell, T cell, natural killer T cell, neutrophil and *ALOX5AP*<sup>+</sup> macrophage )  
158 and one untyped cell cluster, which shows no specific expressed gene compared to other  
159 clusters (Fig. 2a, Extended Data Fig. 2 a-c). The differential genes expressed in epithelial  
160 cells, endothelial cells, mesenchymal and immune cells of lung across the species were  
161 then analyzed (Fig. 2b, Supplementary Table 2). In all the cell types, *DAZAP2*<sup>21</sup>, related  
162 to the regulation of innate immunity and *SUMO2*<sup>22</sup>, redundantly prevent host interferon  
163 response, were expressed at a higher level in bat compared to that of mouse. The genes  
164 related to cell proliferation (*MED28*, *TEMD3*)<sup>23,24</sup>, cell cycle (*GATAD1*)<sup>25</sup>, regulation of  
165 apoptosis and cell death (*ITM2C*)<sup>26</sup>, host defense and inflammatory response (*CTSL*)  
166<sup>27</sup> expressed in higher levels in bat epithelial cells, endothelial cells and mesenchymal  
167 cells, while the *TAPBP*<sup>28</sup>, associated with antigen presentation, and *ARHGDI*<sup>29</sup>, the  
168 regulator of Rho activity expressed higher in bat immune cells.

169 When compared to that of human, higher expression of several genes across the bat  
170 cell types were observed, including *PSMA6*, related to the inflammatory response<sup>30</sup>;  
171 *GABARAP*, a mediator of autophagy and apoptosis<sup>31</sup>; *CDOI*, the tumor suppressor genes  
172<sup>32</sup>; and *RNASE4*<sup>33</sup>, a member of RNase family associated with host defense-related  
173 activities, assumed to interact with pathogen-derived nucleic acid and facilitate their  
174 presentation to innate immune receptors within the cell as immunomodulatory proteins.  
175 Notably, the gene expressed ribonuclease kappa (*RNASEK*)<sup>34</sup>, recently identified as a  
176 host dispensable factor for the uptake of acid-dependent viruses, was highly expressed in

177 bat lung cells (Fig. 2b and Supplementary Table 2). In bat lung epithelial cells, the gene  
178 encoded Heme oxygenase-1 (HMOX1), were observed at a higher level; this gene has  
179 been recognized as having anti-inflammatory properties and anti-viral activity<sup>35,36</sup>. In the  
180 bat monocytes, macrophages and mast cells, *ITGA4* and *IRF9* were expressed more  
181 highly compared to that of human. This well-characterized bat atlas can gain an insight  
182 into cellular heterogeneity at the single cell resolution.

183 For viruses with respiratory and enteric tropism, we analyzed the viral receptor gene  
184 expression level across the cells (Fig. 2c, Extended Data Fig. 2d-g, Extended Data Fig. 3).  
185 This analysis shows that the respiratory virus receptor genes, *ACE2*, *DPP4*, *ANPEP* and  
186 *CXADR* are expressed at a high level in enterocytes, cell cycle-associated cells,  
187 enteroendocrine cells in the intestine, proximal straight tubule epithelial cells, and  
188 collecting duct epithelial cell (principal cells) in the kidney, and also in AT1, ciliated cells  
189 and mesothelial cells in the lung (Fig. 2c). *NCAM1* transcripts are mainly in  
190 oligodendrocyte precursor cells, oligodendrocytes, and astrocytes in the brain. *EFNB2* is  
191 mainly expressed in endothelial cells in the spleen, heart, and intestine, which is  
192 consistent with the NiV and HeV secondary replication sites, and corresponds to their  
193 important role in virus dissemination<sup>19</sup>. In addition, *EFNB2* is also expressed in intestine  
194 epithelial cells, but at a relatively low level, where NiV antigen have been identified in  
195 fatal human cases<sup>19</sup>. The expression of *NPCI* is broadly distributed in epithelial cells,  
196 endothelial cells, and mesenchymal cells.

197 The distribution patterns and expression levels of these receptor genes were then  
198 analyzed in human and mouse. We focused on the receptor genes (*ACE2*, *DPP4*, and  
199 *ANPEP*) of known zoonotic respiratory viruses, shared receptor of human and bat

200 (*CXADR*) and *TMPRSS2* in the cell types in the trachea, lung, intestine and kidney. Bat  
201 exhibits more similar expression pattern to human in some organs (*ACE2* and *ANPEP4*  
202 in intestine epithelial cells; *TMPRSS2* in lung epithelial cells), comparing to that in mouse  
203 (Extended Data Fig. 2g). Although similar expression patterns were detected in bulk-seq  
204 data at organ level, the differences of cell types among species revealed by single cell  
205 data suggest bat as a better model for viral cross-species transmission research.

206 The other human viral receptor genes *NCL*, *CD55*, *HSPG2*, and *PDGFRA*, are  
207 expressed in the epithelial cells in both the respiratory tract and intestine, the viral  
208 tropism cell types (Extended Data Fig. 3). The transcripts of desmoglein 2 (*DSG2*), the  
209 receptor of Adv, Fc fragment of IgG receptor and transporter (*FCGRT*), fusion receptor of  
210 enterovirus B, are mainly expressed in epithelial cell and brush cell of the trachea,  
211 ciliated cell of the lung, and enterocytes in the intestine. These findings provide insights  
212 to understand the cellular tropism of respiratory tract and intestinal tract viruses  
213 (Extended Data Fig. 3).

214 This analysis of cell type specific gene expression data suggests that the distribution  
215 of viral entry receptor genes cannot explain the asymptomatic nature of viral infection in  
216 bats, and nor can it be explained by differential gene expression in those cell types. The  
217 molecular and cellular characteristics of the immune response in the bat were therefore  
218 then analyzed.

219

## 220 **The Adaptive Immune System: T and B cell clustering and analysis**

221 Adaptive immunity in bats has been of great interest to understand their  
222 asymptomatic infection status as “viral reservoirs”. At the single-cell level, we analyzed

223 the transcription features exhibited in immune cells. T cells differentially expressed CD3  
224 genes in all organs are analyzed by using unsupervised clustering method implemented in  
225 Scanpy<sup>37</sup>. A total of 13 stable clusters are obtained, and each with unique signature genes  
226 (Extended Data Fig. 3a, 3b, Extended Data Fig. 4a-4c). In many organs, the number of  
227 activated T cells is much more than naïve T cells, such as liver, lung, trachea, intestine,  
228 pancreas, bladder, heart, kidney, and wing membrane (Extended Data Fig. 4d). Five  
229 clusters (C7, C8, C9, C11, and C12) express *CD8* genes, and seven clusters (C1-C6, and  
230 C13) are composed of a mixture of CD4<sup>+</sup> and CD8<sup>+</sup> T cells. Most of C1, C3, C4 and C6  
231 cluster are CD4<sup>+</sup> T cell, while most of C2, C5, and C13 are CD8<sup>+</sup> T cells. Cluster 10 is  
232 composed of CD3<sup>+</sup>CD4<sup>-</sup>CD8<sup>-</sup> T cells. Cells of C1\_CD4T<sub>N</sub> and C2\_CD8T<sub>N</sub> clusters  
233 expressing “naïve” marker genes such as *LEF1*, *CCR7*, and *TCF7*<sup>38</sup> are mostly from  
234 spleen and bone marrow, respectively (Extended Data Fig. 4b, c, e). The cluster of  
235 C3\_T<sub>REG</sub>-like is characterized by the expression of the *IL2RA* and *CCR8* genes,  
236 commonly associated with regulatory T cells (T<sub>REG</sub>-like). However, the *FOXP3* gene  
237 shows no expression in the clustered cells. The C4\_T<sub>CM</sub> cluster characterized by *CCR7*,  
238 *SELL*, and *GPR183* is composed of central memory T cells (T<sub>CM</sub>). The C5\_T<sub>EM</sub> cluster is  
239 closest to effector memory (T<sub>EM</sub>) T cells in many organs, in accordance with the  
240 expression of *CD44*, *CXCR3*, *GZMK*, *CCL5*, *CTSW* and *NKG7*, and the lack of  
241 expression of lymph node-homing receptors *CCR7* and *SELL*. The C6\_T<sub>EM</sub>/T<sub>H</sub>1-like  
242 cluster characterized by *IFNG*, *CXCR3*, *GZMK*, and *CD4*, which mainly distributed in the  
243 intestine, lung, and liver. The C7\_T<sub>H</sub>17 cluster contains T<sub>H</sub>17 cells mainly in the trachea  
244 and lung, with high level expression of *IL23R* and *RORC* genes. In addition to T<sub>EM</sub> cells,  
245 recently activated effector memory or effector T cells (T<sub>EMRA</sub>) are also identified. The

246 C10\_T<sub>EMRA</sub> differentially highly expressed effector molecules such as *NKG7*, *ZNF683*,  
247 *CTSW*, *CCL5*, *GZMA*, *XCLI*, *KLRG1*, and *TBX21*. It has been reported that chemokines  
248 *XCLI* and *CCL5* derived from NK cells recruit cDCs into the tumor microenvironment,  
249 which are critical for antitumor immunity<sup>39</sup>, while *KLRG1*+*TBX21*+ T cells are  
250 long-lived effector cells, which contribute to infection control (Fig. 3b, Extended Data  
251 Fig. 4a-c).

252 The cells in C8\_ tissue-resident memory T (T<sub>RM</sub>)-*GZMA*<sup>high</sup>, C9-T<sub>RM</sub>-*ZNF683*<sup>high</sup>,  
253 and C11\_IEL clusters express the *ITGAE* gene, a known marker of T<sub>RM</sub> cells. They share  
254 signature genes, such as *TIMP1*, *RGS1*, and *FCER1G*. The cells in C8\_T<sub>RM</sub>-*GZMA*<sup>high</sup>  
255 are predominantly from the intestine and express cytotoxic molecules such as *GZMA*,  
256 *GNLY*, *PRF1*, and *CCL5*. Most of the cells in C9\_T<sub>RM</sub>-*ZNF683*<sup>high</sup> are from the liver,  
257 which express higher levels of effector molecules such as *ZNF683*, *NKG7*, *XCLI* and  
258 *CCL5*, and interferon stimulating genes (ISGs), including *IFNG* and *IRF7*. The cells in  
259 the C11\_IEL cluster are detected exclusively in the wing membrane, which are  
260 considered as intraepithelial lymphocytes (IEL) as they highly expressed natural killer  
261 cell receptor genes, *NCR1* and *KLRB1*<sup>40</sup>. These cells also display overwhelmingly active  
262 molecules *CD44*<sup>41</sup>, chemokine *XCLI*, and ISG *CD9* (Fig. 3c, Extended Data Fig. 4e).

263 The C12\_NKT-like cluster characterizes NK cell receptor genes, including *KLRB1*,  
264 *KLRD1*, *KLRF1*, *KLRG1*, *NCR1*, and *NCR3* genes. All the genes express overlapping  
265 with the *CD3* gene and the cluster is considered as NKT-like cells. The C12\_ NKT-like  
266 cluster is composed of three subsets and each subset expressed distinct high level genes  
267 in different organs (Fig. 3d-3g). The subset-1 which highly express *KLRG1*, *GZMA*, and  
268 *ITGA4* is considered as long-lived effector NKT and contribute extensively to immune



269 surveillance<sup>42</sup>. The subset-2 highly expresses active gene *CRTAM* and *CD69*, peptidase  
270 inhibitor gene (*IP3*), chemokine *XCL1*, and immediate early genes (IEGs), such as *JUND*,  
271 *NR4A1*, and *FOSB*. IEGs are rapidly activated at the transcriptional level in the first  
272 round of response to stimulation prior to any nascent protein synthesis. These data  
273 suggest subset-2 NKT-like cells are in active states. The subset-3 NKT-like cells highly  
274 express *SCGB3A1*, *SCGB3A2*, *MAPT*, *GPLY*, and *BCL2*. The *SCGB3A1* is a tumor  
275 suppressor gene, while *SCGB3A2* is a negative inflammation response gene.  
276 C13\_proliferating T cells are significantly enriched in the expression of cell cycle genes  
277 (Fig. 3f, Extended Data Fig. 4a-4c), such as *MKI67*, *UBE2C*, *CENPF*, *PCLAF*, *TOP2A*,  
278 indicating the proliferative states of the C13 cells.

279 B cells are annotated into five clusters according to the marker genes (Fig. 3h, 3i).  
280 C1 cluster contains activated B cells expressing high levels of *CD86*, *CAPG*, *AHNAK*,  
281 *ANXA2*, and *PHACTR1*. C2 is defined as germinal center B (GC B) cell with the specific  
282 expression of BCL-6, and cell cycle-related genes (*MKI67*, *TOP2A*, *CENPF*, *CDCA3*,  
283 and *CDKN3*) C3 cluster is defined as marginal zone B (MZB) cell, which highly  
284 expressed *MZB1*, *DTX1*, and NW\_017739275.1:124060-124578 (corresponding to  
285 *Rousettus aegyptiacus* complement component 3d receptor 2 (CR2) gene). Some MZB  
286 cells express *SDC1*, indicating a conserved maturing location of plasma cells. The C4  
287 cluster is characterized by higher expression of *FABP4*, *RGS1*, *STAP1*, and *PIK3R1*,  
288 which are defined as naïve/memory B cells. The C5 cluster is annotated as long-lived  
289 plasma cells, in which the transcription genes *SDC1*, *PRDMI*, and *XBPI* and marker  
290 genes *SDC1* and *TNFRSF17* expressed at a high level, while *CD19* and *MS4A1* were  
291 under-expressed. A majority of B cells were in the spleen and adipose tissues (Fig. 3j).

292

### 293 **The gene expression patterns of mononuclear phagocytes**

294 Mononuclear phagocytes (MNPs) play a critical role in pathogen sensing,  
295 phagocytosis, and antigen presentation. The MNPs in bat tissues are profiled and 12  
296 clusters are grouped according to differentially expressed transcripts (Extended Data Fig.  
297 5a, Supplementary Table 1). C9\_granulocyte-monocyte progenitor (GMP) is identified in  
298 bone marrow, with specific expression of *CTSG*, *MPO*, *ELANE*, and *RTN3*. Two clusters  
299 of monocytes are identified, including C3-classical monocyte (cMo) and C1\_nonclassical  
300 monocyte (ncMo). Six clusters are macrophages, including C0\_CSF3R<sup>high</sup> macrophage  
301 (CSF3R<sup>high</sup> Mac), C10\_CD300E<sup>high</sup> macrophage (CD300E<sup>high</sup> Mac), C2\_Kuffer cells  
302 (KC), C4\_SPIC<sup>high</sup> macrophage (SPIC<sup>high</sup> Mac), C5\_LYVE1<sup>high</sup> macrophage (LYVE1<sup>high</sup>  
303 Mac), and C6\_CCL26<sup>high</sup> macrophage (CCL26<sup>high</sup> Mac). The macrophage clusters are  
304 characterized by unique expressed genes, such as CSF3R and *SERPINA12* in CSF3R<sup>high</sup>  
305 Mac, *CD300E* and *LPO* in CD300E<sup>high</sup> Mac, *MARCO* and *CLEC4G* in KC, *CNTNAP2*,  
306 *SPIC*, and *VCAM1* in SPIC<sup>high</sup> Mac, *LYVE1* and *DAB2* in LYVE1<sup>high</sup> Mac, *CCL26* and  
307 *SCD* in CCL26<sup>high</sup> Mac (Extended Data Fig. 5b, Supplementary Table 1). KC, SPIC<sup>high</sup>  
308 Mac, LYVE1<sup>high</sup> Mac, and CCL26<sup>high</sup> Mac are tissue-resident macrophages with high  
309 expression of *CIQA*, *CIQB*, *CIQC*, and *MAFB*. A total of about 600 differentially  
310 expressed genes are identified in cross different tissue-resident macrophage populations.  
311 The differential expressed genes in CSF3R<sup>high</sup> Mac, mainly identified in the intestine, are  
312 enriched in leukocyte migration, leukocyte chemotaxis, and positive regulation of  
313 response to external stimulus in GO annotations (Extended Data Fig. 5c and 5d). SPIC<sup>high</sup>  
314 Mac mainly comes from the spleen. The enriched genes for GO annotations are mainly

315 responsible for signal transduction, activation of the immune response, and regulation of  
316 monocyte chemotaxis. LYVE1<sup>high</sup> Mac contains many organs macrophages, such as the  
317 bladder, pancreas, thymus, adipose tissue, heart, tongue, trachea, testis, kidney, lung,  
318 muscle, and intestine. The enriched gene functions mainly include wound healing, cell  
319 migration, and protein activation cascade. CCL26<sup>high</sup> Mac cluster contain macrophages of  
320 the lung and trachea, which are mainly associated with lipid transport and metabolic  
321 process, phagocytosis, and regulation of endocytosis (Extended Data Fig. 5c, d).

322 Four DCs subtypes are determined (Extended Data Fig. 5a). C7\_cDC1 is  
323 characterized by *FLT3*, *CLEC9A*, *XCRI*, *IRF8*, and *CPVL*. C12\_pDCs highly express  
324 *TCF4*, *IRF8*, *IL3RA*, *IRF4*, *LAMP3*, *BCAS4*, and *GPM6B*. C11 is annotated as activated  
325 DCs, with high expression of DC hallmark receptor gene *FLT3*, activation marker gene  
326 *LAMP3*, co-stimulatory molecule genes *ICOSLG* and *CD83*, and chemokine receptor  
327 genes *CCR7* and *IL7R*. C8\_Langerhans cells (LCs) are mainly located in the wing  
328 membranes, with highly expressed genes of *FLT3*, *RUNX3*, *EPCAM*, and *TACSTD2*  
329 (Extended Data Fig. 5b, c). Collectively, monocytes, macrophages, and DCs display  
330 distinct gene landscapes, which likely form the basis of MNPs specificity and plasticity.  
331 The distinct gene profiles of MNPs may contribute to the critical role of MNPs in  
332 pathogen sensing, phagocytosis, antigen presentation, tissue function and homeostasis.

333

### 334 **Innate immunity: the response of bat primary lung fibroblast cells against RNA** 335 **virus infection**

336 We then studied the innate immunity activities since it is the first-line to control the  
337 virus infections. Real-time quantitative PCR analysis revealed that innate immunity

338 related genes, such as retinoic acid-inducible gene-I (*RIG-I*), melanoma  
339 differentiation-associated protein 5 (*MDA5*), toll-like receptor (*TLR*) 3, *TLR7-9*,  
340 interferon regulatory factor (*IRF*) 3, *IRF7*, *IFN* $\alpha$ ,  $\beta$ ,  $\omega$ , and  $\gamma$ , are expressed in various  
341 tissues (Extended Data Fig. 6). All of these genes are highly expressed in the spleen and  
342 white adipose tissue. Furthermore, *TLR3* and *TLR7* are highly expressed in the intestine.  
343 *RIG-I*, *MDA-5*, *TLR-3*, *TLR-8* and *IRF3* are highly expressed in the lung (Extended Data  
344 Fig. 6).

345 To analyze the innate immune activities at the lung cellular level, we isolated  
346 primary bat lung fibroblasts (BPFs). According to the transcriptomic data, the lung stomal  
347 cells constitutively expressed innate immune genes (Extended Data Fig. 7). An RNA  
348 virus, vesicular stomatitis virus (VSV), and/or the analogs stimulating the signaling  
349 pathways, were used to treat BPFs and human primary lung fibroblasts (HPFs) (Fig. 4a).  
350 The cells were stimulated with poly (I:C), R848, the analogs of *RIG-I/MDA-5*, *TLR3*,  
351 and *TLR7/8*, respectively, as well as VSV. At 4 hours (h), 8h, 12h and 24 h after treatment,  
352 the expression levels of *RIG-I*, *MDA5*, *IFN* $\alpha$ ,  $\beta$ , *IL-6* and *TNF* $\alpha$  were analyzed. In  
353 HPF, the transfection of poly (I:C) induces the expression of *IFN* $\alpha$ ,  $\beta$  about 4,000-fold  
354 compared to untreated cells at 4h post-treatment, while the incubation of poly (I:C), for  
355 the purpose of stimulating the *TLR3* pathway showed similar results (Fig. 4c-4e).  
356 However, the extent of *IFN*- $\beta$  mRNA induction was much lower in BPFs when compared  
357 with HPFs after 4h post-treatments ( $p=0.000$ , student *t* test). The transfection of R848  
358 induces higher expression levels of *IL-6* and *TNF* $\alpha$  mRNA in HPFs, but not in BPFs (Fig.  
359 4b). Similar results were obtained in VSV-infected cells (Fig. 4f). Although the VSV  
360 replicates in a low level in BPFs compared to that of HPFs, the mRNA levels of *MDA-5*

361 and RIG-I increased slightly. However, the transcription of IFN- $\beta$ , IL-6, and TNF- $\alpha$   
362 does not increased significantly compared with that in HPFs.

363

## 364 **Discussion**

365 The single-cell transcriptome data obtained from the model organism mouse and  
366 human has established a reference database in mammals for deep molecular annotation of  
367 cell types<sup>13-15</sup>. Here, we have created a parallel cell atlas in an important organism  
368 trapped from the wild.

369 Most emerging infectious diseases in humans are dominated by zoonoses<sup>43</sup>. Over  
370 millions of years, bats have evolved a special ability to carry a variety of viruses but  
371 show little or no signs of disease. However, many of these viruses result in devastating  
372 infection when they cross the species barrier to humans<sup>44,45</sup>. Bats are social animals and  
373 diverse viruses circulate within the colony, allowing them to be important natural viral  
374 reservoirs<sup>45</sup>. Viral strains or mutants adapted to human beings or other species may  
375 occur during the circulation, which can spill over to human beings or other animal  
376 species (intermediate species). This may result in epidemics or outbreaks in human  
377 beings by bat-human or bat-intermediate hosts-human transmissions<sup>46</sup>. Therefore,  
378 bat-borne viruses etiologically play a pivotal role in human emerging infectious diseases  
379 (EIDs), and understandings in how bat carry and transmit viruses has become a priority  
380 issue for the EIDs alert and prevention<sup>47,48</sup>. The infection and replication of viruses rely  
381 on specific host cells due to their parasitic nature. Interactions between the virus and the  
382 host affect the infections and the replicate abilities of the virus, and we have lacked an  
383 understanding of how host cell biology determines whether the infection is asymptomatic  
384 or pathogenic. Furthermore, the pathogen's shedding route is highly dependent on the

385 replication tissue sites. However, the lack of precise annotation of cellular composition of  
386 bat organs/tissues has hindered the understanding on the many key aspects of zoonotic  
387 virus origin in bats, e.g. the mechanisms of asymptomatic bearing of diverse viruses,  
388 tropism and tissue targeting, virus shedding route and interspecies transmission, etc. It is  
389 critically needed to elucidate the cellular composition as well as their functions and  
390 interplay in various bat organs/tissues. However, it is still hard to create bat cell atlas by  
391 conventional immunological or histological approaches due to the lack of sufficient  
392 antibody reagents at present. Single-cell sequencing does not rely on cell surface protein  
393 markers and antibodies. By clustering based on the transcription characteristics and  
394 specifically transcribed genes, cells in organ/tissues can be classified by sc-seq. In this  
395 study, we developed the first bat cell atlas by single-cell RNA-seq, which provides a  
396 powerful tool for in-depth understanding of the cellular mechanisms by which how bats  
397 carry, shed and cross-species transmit viruses.

398 Binding and entry into the host cell is the first step of virus infection. The specific  
399 receptor molecules on host cell membranes govern whether a virus can enter and infect  
400 the cells. The bat-borne viruses, such as SARS-CoV, MERS-CoV, HeV, NiV, RABV,  
401 EBOV, and MARV, have emerged for more than twenty years and resulted in human  
402 infections in the world. A crucial factor for these viruses infected human is that these  
403 viruses could enter the human cells through specific receptors. In this study, it was found  
404 that bat-borne viruses share similar receptor distributions and expression in bat and  
405 human. For example, the the NPC1 (receptor of EBOV and MARV) are distributed in  
406 most organs in bat and human, with similar expression levels. It has been reported that  
407 patients succumbed to EBOV and MARV infections have extensive necrosis in

408 parenchymal cells of many organs, including liver, spleen, kidney, and gonads<sup>49</sup>, which is  
409 consistent with the distribution of receptors in bat in this study. Further, EBOV and  
410 MARV have a broad cell tropism. It has been verified from fatal human cases or  
411 experimentally infected nonhuman primates that EBOV and MARV could infect and  
412 replicate in monocytes, macrophages, dendritic cells, endothelial cells, fibroblasts,  
413 hepatocytes, and several types of epithelial cells<sup>20,50</sup>. The distributions of NPC1 in  
414 immune cells and nonimmune cells further support the broad cell tropism of EBOV and  
415 MARV. ACE2, the SARS-CoV and SARS-CoV-2 receptor, is expressed in epithelial cells  
416 of the lung and the small intestine, which are the primary targets of the two CoVs, as well  
417 as in the heart, kidney, and other tissues<sup>16,51</sup>. In this bat data, it was found that *ACE2* is  
418 mainly expressed in different epithelial cells of the intestine, lung and trachea, such as  
419 enterocytes, enteroendocrine cells, goblet cells and tuft cells, and lung and trachea  
420 ciliated cells. *TMPRSS2* shows higher expression in enterocyte of the intestine, AT1 in  
421 the lung and collecting duct cells in the kidney. However, most of the receptor genes of  
422 respiratory viruses show a higher expression level in bat intestine epithelial cells.  
423 Previous studies also showed that SL-CoVs are majorly detected in the intestine of bats<sup>3,4</sup>.  
424 These findings indicate that intestine is probably a major site where many viruses reside  
425 and replicate, such as SL-CoVs<sup>4,7</sup>. This may facilitate their dispersal in the nature as feces  
426 harboring the shed viruses can touch other animal species more effectively than the  
427 respiratory route. These data suggest that the similar receptor distribution patterns  
428 between bat and human may be one of the bases of cross-species spread of bat borne  
429 viruses. Further, some virus receptors, such as SARS-CoV, SARS-CoV-2, MERS-CoV,  
430 HeV, NiV, RABV, EBOV, and MARV, are also co-located in the lung, bladder, and

431 intestine of both species, which is critical in virus transmission. The clarifications on the  
432 consistence and difference of surface molecular patterns between bat and human across  
433 cell types, for example, the viral receptor gene, would be informative to assess the  
434 cross-species transmission risk of bat borne viruses.

435 The knowledge of cellular immunity of bats is quite limited. According to the sc-seq  
436 data, we found that CD8<sup>+</sup> T cells were predominant over CD4<sup>+</sup> T cell in Chinese  
437 horseshoe bats (*Rhinolophus sinicus*). All tissue-resident memory T cells, including  
438 C8-T<sub>RM</sub>-GZMA<sup>high</sup>, C9-T<sub>RM</sub>-ZNF683<sup>high</sup>, and C11\_IEL, are CD8<sup>+</sup> T cells. These T<sub>RM</sub>  
439 cells highly expressed many effector molecules such as *GZMA*, *GZMB*, *PRF1*, *ZNF683*,  
440 *NKG7*, *XCL1* and *CCL5*, and so forth. Microbes most often attack body surfaces and  
441 mucosal sites. T<sub>RM</sub> cells lie in frontline sites of infection and need not proliferate. They  
442 are anatomically positioned to respond most immediately, which contribute to pathogen  
443 control after the initial infection. In addition to T<sub>RM</sub> cells, most of T<sub>EM</sub> and NKT-like cells  
444 are CD8<sup>+</sup> T cells, and they express many effector molecules and IEGs. Specifically,  
445 subset-2 NKT-like cells highly expressed IEGs, which can induce a rapid response to  
446 stimuli before new protein synthesis. At the same time, *CD69*, an activation inducer  
447 molecule, displays high enrichment in subset-2 NKT-like cells. These data imply an  
448 active state of the NKT-like cells in subset-2. Collectively, these predominant CD8<sup>+</sup> T  
449 cell and their functional states suggest that the immune baseline level of the bat is quite  
450 high and is geared towards fighting microbe infections. The resident tissue CD8<sup>+</sup>T cells  
451 and NKT-like cells with the higher expression level of immediate early genes indicates  
452 effective cellular immunity response restricting viral infections in bats.

453 It has been reported that *KLRG1*<sup>+</sup> T cells and NKT are long-lived effectors and



454 optimally provide immediate protective immunity against certain pathogens<sup>42,52</sup>. In this  
455 study, subset-1 NKT-like cells display high expression of *KLRG1*, with co-expressed  
456 *ITGA4* and *GZMA*. These NKT-like cells distribute in different tissues of the bat. This  
457 will help the bat to better conduct immune surveillance and fight against infections and  
458 tumors. T<sub>EMRA</sub> cells present high expression of *KLRG1* and *TBX21* in the bat, which have  
459 been reported to be expanded and maintained long term following boosting, without  
460 losing their protective superiority<sup>52</sup>. T<sub>RM</sub> cells resident in the local environment long after  
461 peripheral infections subside. If an infection is localized to peripheral or extralymphoid  
462 compartments, T<sub>RM</sub> cells would provide superior immune protection than circulating  
463 memory T cells<sup>53</sup>. The circulating CD8<sup>+</sup> memory T cells is failed to control the wing  
464 membrane infection with HSV, while the T<sub>RM</sub> cells in the wing membrane provide local  
465 protection against infection in the absence of ongoing T-cell stimulation. We found that  
466 there are many T<sub>RM</sub> cells in the bat intestine, liver, and wing membrane, indicating an  
467 activated adaptive immunity, which may offer effective barrier immune protection for  
468 bat.

469       The highly activated cellular immunity may protect bats from viral damage. But how  
470 can the virus reside and replicate in bats? The tolerance of viral infections in bats appears  
471 to involve a balance between viral clearance and host tissue damage promoted by  
472 proinflammatory effectors. The innate immune system is the first defense against  
473 invading pathogens in mammals and type I IFNs are induced very early in viral infection.  
474 The magnitude and nature of the IFN response determines whether the resulting effects  
475 on the host are harmful or beneficial<sup>54</sup>. In Chinese horseshoe bats (*Rhinolophus sinicus*),  
476 the IFN gene loci are still not clarified clearly. However, the critical components of the

477 IFN signaling pathway have been investigated<sup>55,56</sup>. For example, the sequences of RIG-I,  
478 STAT-1 and IFN- $\beta$  have close homology with human, mouse, pig and rhesus monkey in  
479 immortalized embryonic fibroblast (BEF) cell lines from *Rhinolophus affinis* and  
480 *Rhinolophus sinicus*<sup>57</sup>. Our data show that the critical host genes in the IFN signaling  
481 pathways are expressed across the cell types. To characterize the innate immunity in bat,  
482 we isolated BPFs from one of the Chinese horseshoe bat (*Rhinolophus sinicus*) lungs. We  
483 found that the induction of most major pathogen associated recognition pattern (PAMP)  
484 receptors, including RIG-I, TLR-3, and TLR7/8 as well as IFN- $\beta$  and proinflammatory  
485 factors, such as IL-6 and TNF $\alpha$ , are very low in BPFs compared to HPFs when stimulated  
486 by polyI:C and VSV. These data indicated that the signaling pathways of innate immunity  
487 in bat are tightly suppressed. The low level innate immune response may enable the bats  
488 to asymptotically harbor viruses.

489 In conclusion, we show here a first comprehensive bat cell atlas based on single-cell  
490 transcriptional landscape of 19 organs from Chinese horseshoe bat. By combining the  
491 sc-seq and bulk-seq data, we characterized the distribution patterns of multiple known  
492 human viral receptors in bat and human across organs and cell types. We also  
493 demonstrate an orchestration of highly activated adaptive immunity and suppressed  
494 innate immunity status, which may form a precise immune hemostasis which allow the  
495 virus harbor in bats without pathological damage. Our findings provide insights into the  
496 cellular mechanisms to enable bats to serve as natural viral reservoirs, largely informing  
497 an active alert and control of epidemics caused by bat borne viruses.

498

499 **Online content**

500 The methods, additional references, source data, statements of data availability and  
501 associated accession codes are available online.

502

## 503 **Methods**

### 504 **Bat, organs and single cell preparation**

505 The two male Chinese horseshoe bat (*Rhinolophus sinicus*) were obtained in  
506 October, 2018 from Anhui province, China. The bats were placed separately and  
507 transferred to the lab. The species of each bat was identified by field biologists and  
508 recorded. After anaesthetization with pentobarbital sodium (75mg/kg), bats blood was  
509 drawn via cardiac puncture using sterile syringes, then the other organs and tissues were  
510 isolated as followed, pancreas, intestine, spleen, liver, kidney, brown adipose tissue  
511 (interscapular adipose tissue), white adipose tissue (visceral and subcutaneous adipose  
512 tissue), thymus, heart, lung, trachea, bladder, testis, tongue, brain, muscle, wing  
513 membrane, and bone marrow (forelimb bones). The cell suspensions from each tissue and  
514 organ were prepared and the details were available as followed. The experiments and  
515 programs were reviewed and approved by the Institutional Animal Care and Use  
516 Committee of the Institute of Laboratory Animal Science, Peking Union Medical College  
517 (BYS18003).

### 518 **Single cell preparations.**

519 The whole blood was quickly transferred into 1.5ml sterile tubes with anticoagulant  
520 EDTA and mixed gently, then suspended with 0.5 ml of red blood cell lysis buffer. Cell  
521 suspension was incubated on ice for 1 min and lysis reaction was quenched by adding 10

522 ml Dulbecco's Phosphate Buffered Saline (DPBS) with 2 mM EDTA and 0.5% BSA.  
523 Cells were collected at 200g $\times$  for 5 min at 4 °C and washed with DPBS for two times to  
524 remove the lysis buffer. The viability of cells was determined with trypan blue stain  
525 method by calculating the rate of bright cells (viable) to stained cells (no-viable) with  
526 hemocytometer.

527 Splens were rinsed and dissected quickly in cold DPBS, then squeezed to pass  
528 through a 70  $\mu$ m strainer using plungers. Cells were collected into a 50ml centrifuge tube,  
529 and then centrifuged at 300 g $\times$  for 5 min at 4°C. Cells were resuspended with 3 mL of red  
530 blood cell lysis buffer. Cell suspension was incubated on ice for 1 min and lysis reaction  
531 was quenched by adding 20 ml DPBS with 2 mM EDTA and 0.5%BSA. Cells were  
532 collected at 300g $\times$  for 5 min at 4°C and washed for 2 times with DPBS, then counted  
533 with hemocytometer after Trypan blue staining as described above.

534 Bone marrow was isolated from bat forelimb bones. Both ends of bones were  
535 carefully trimmed to expose the interior marrow shaft after removed the wing membrane  
536 and muscles. The bone marrow cells were flushed by using 1 ml syringe with DPBS for  
537 several times, all the cells were collected into a 70  $\mu$ m strainer hanging on a 50 ml  
538 centrifuge tube. Bone marrow cells on the strainer were gently squeezed to pass through  
539 by using plungers. Cells were centrifuged at 200 g for 5 min at 4°C and resuspended with  
540 red blood cell lysis buffer. The red blood cell lysis, washing, and cell counting process  
541 were similar as above.

542 Other organs were minced into pieces on ice with sterile scissors respectively. Tissue  
543 pieces were respectively transferred into a 15 ml centrifuge tube and suspended with 5 ml

544 of enzymatic digestion buffer. Samples were treated with different enzymes formula. The  
545 bladder, brain, brown and white adipose tissue, intestine, liver, lung, pancreas, testis,  
546 thymus, and trachea were respectively digested in enzymatic digestion buffer with  
547 0.4mg/ml collagenase IV, 0.4mg/ml collagenase/dispase, 30U/ml DNase, 0.5% BSA in  
548 HBSS, at 37°C, 100rpm for 30min. Heart was digested with 1mg/ml collagenase/dispase,  
549 30U/ml DNase, 0.5% BSA in HBSS at 37°C, 100rpm for 45min. The intestine, muscle  
550 and testis were digested in enzymatic digestion buffer with 0.4mg/ml collagenase II,  
551 30U/ml DNase, 0.5% BSA in HBSS, at 37°C, 100rpm for 60min. The kidneys and wing  
552 membrane were digested with 0.25% Trypsin and 30U/ml DNase, at 37°C for 15min and  
553 30min, respectively. Tongue was digested with 0.4mg/ml collagenase IV, 30U/ml DNase,  
554 0.5% BSA in HBSS, at 37°C, 100rpm for 60min. Tissue pieces were pipetted up and  
555 down gently for several times to dissociate into single cells during digestion. After  
556 passing through a 70 mm strainer, the dissociated cells were centrifuged at 300 g for 5  
557 min at 4°C and treated with red blood cell lysis procedure. All the treated cells were  
558 finally diluted to a density of 1000 cells/ $\mu$ l in DPBS with 0.4% BSA.

### 559 **Single-cell sequencing library construction and sequencing**

560 Sc-seq libraries were constructed by using the Single-Cell Instrument (10  
561  $\times$ Genomics, Pleasanton, CA) with Chromium v2 single cell 3' library and gel bead kit V2  
562 (10  $\times$  Genomics, Pleasanton, CA). In brief, cell suspensions were diluted in DPBS with  
563 0.04% BSA to concentration of 1,000 cells/ $\mu$ l and the concentration was measured with  
564 haemocytometer. The volume of single cell suspension required to generate 4,000 single  
565 cell gel beads in emulsion (GEMs) was loaded into a separate channel on the Single Cell  
566 3' Chip. The final libraries were qualified with Agilent 2100 Bioanalyzer (Agilent

567 Technologies, Santa Clara, CA, USA), and quantified by qPCR with the quantification kit  
568 (Tian Gen company, China) for Illumina with QuantStudio 12K Flex Real-time PCR  
569 system (Thermo Fisher Scientific, Waltham, MA, USA). Libraries were diluted to 2 nM  
570 in each and pooled with equal volume before sequenced on Hiseq X Ten (Illumina, Inc.,  
571 San Diego, CA, USA) with 150-bp pair-end strategies.

### 572 **Bulk RNA-seq library construction and sequencing**

573       Approximately 30-50 mg of each tissue was collected from each bat and  
574 homogenized using FastPrep-24 system (MP Biomedicals, France) in 1ml of TRIzol  
575 (Invitrogen, Carlsbad, CA). RNA was then extracted following standard protocol. The  
576 RNA qualities determined by RNA Integrity Number (RIN) were assessed on an Agilent  
577 Bioanalyzer RNA 6000 nano chip (Agilent Technologies, Santa Clara, CA, USA). The  
578 libraries were constructed by using the NEBNext ultra II RNA library prep kit (New  
579 England BioLabs, Ltd., USA) and the qualities were analyzed with Agilent 2100  
580 Bioanalyzer (Agilent, Santa Clara, CA). Libraries were then sequenced on HiSeq X Ten  
581 (Illumina) with 150-bp pair-end strategies.

### 582 **Single cell sequencing data processing and clustering**

583       Sequencing reads were first aligned to *Rhinolophus sinicus* genome  
584 (GCA\_001888835.1) using Cell Ranger (version 3.0.0, 10× Genomics) with default  
585 parameters. Then the sequencing data was processed for filtering, variable gene selection,  
586 dimensionality reduction, and clustering by using Scanpy package (version 1.3.7). Cells  
587 with fewer than 500 detected genes were excluded, as well as expressed fewer than 1,000  
588 unique molecular identifiers (UMIs). Gene expressions were normalized as divided by  
589 total UMIs of each cell and multiplied by 10,000. Highly variable genes were selected by

590 coefficient of variation with cutoff of 0.5. After log-normalized and scale, the data  
591 dimensionality was reduced by principal component analysis (PCA) by variable genes.  
592 Neighborhood graph of observations were computed based on the Euclidean distance and  
593 parameters were adjusted for each tissue. The Batch balanced KNN package (bbknn,  
594 version 1.3.1) was used for batch correcting followed the procedure by identifying the K  
595 nearest neighbours for each individual cell. Cluster cells using the Leiden algorithm and  
596 cell type of each cluster was determined by using the abundance of known marker genes.  
597 Cells were visualized using UMAP method which is a manifold learning technique  
598 suitable for visualizing high-dimensional data. To compare the human and mouse gene  
599 expression with the bat respectively, we use the public databases of human metadata  
600 available on GEO (accession GSE130148) and mouse metadata online  
601 (<http://tabula-muris.ds.czbiohub.org/>) for later normalization and gene expression  
602 comparison.

### 603 **Bulk sequencing data processing**

604 The gene expression profiles of bat tissues from bulk-seq data were performed  
605 following typical RNA-Seq procedure with reference genome. The raw-reads were  
606 treated to generate clean-read datasets by the following procedure. Reads with adaptors  
607 or containing unknown nucleotides more than 5% were removed directly. The  
608 low-quality reads containing more than 20% suspect-nucleotides of Phred Quality Score  
609 less than 10 were then filtered out. The qualified reads were evaluated to trim unreliable  
610 ends containing more than 3 successive suspect-nucleotides. Clean-reads were mapped to  
611 *Rhinolophus sinicus* genome by hisat2. Read counts of each gene were calculated by  
612 stringtie and prepDE.py scripts. The count matrix was then processed by DESeq2 for

613 normalization and expression profiles.

#### 614 **Gene Ontology (GO) analysis**

615 Differential genes were obtained by comparing the each macrophage cluster with  
616 others, than the genes were used for analysis with p-adjust value  $< 0.05$ , mean expression  
617 value  $> 1$ . The differential expression more than two times were further performed Gene  
618 ontology (GO) analysis using clusterprofiler package<sup>58</sup> with mouse database  
619 (org.Mm.eg.db). A P value  $\leq 0.05$  was considered significant and enriched GO terms were  
620 sorted by counts. A column chart was plotted using top 10 GO terms.

#### 621 **Comparative analysis of gene profiles in bulk and single-cell sequencing**

622 The characteristics genes in each tissue were selected from bulk-seq data if their  
623 expression level were more than 50, and 10-fold higher than other tissues. Heat-map was  
624 made by Seaborn package (0.9.0), showing the genes expression level in selected tissue  
625 compared to the average of level in all tissues. These genes were than analyzed in  
626 single-cell sequencing data to decide the distribution in each tissue by average  
627 expression.

628 To compare the human and mouse gene expression with the bat respectively, we use  
629 the public databases of human metadata available on GEO (accession GSE130148,  
630 GSE134355) and mouse metadata online (<http://tabula-muris.ds.czbiohub.org/>) for later  
631 normalization and gene expression comparison.

#### 632 **Correlations of cell type specific transcription genes**

633 After the decision of cell types with significant transcription genes (average  
634 difference of  $> 1$ ), the average gene transcription factor sets that distinguish each  
635 individual cell type from all other cells was calculated. The pearson's correlations of



636 specific cell types were analyzed with corr imbed in pandas package (version 0.23.4).

### 637 **T cells analysis**

638 T cells analysis was performed by involved all organs. The differential analysis of  
639 each organ was performed, and the gene with log2 fold change  $\geq 2$  and pval\_adj  $< 1$  was  
640 extracted. PCA is used for dimensionality reduction of T cells data. And then T cells  
641 were clustered by using leiden model, and reduced-dimensional mapping by using umap.

### 642 **Amino acid identity of viral receptor genes**

643 To analyze the identity of viral receptor genes, all related coding sequences were  
644 downloaded from Ensembl and GenBank representing human, bats and mouse. The  
645 sequences were manual checked to avoid false annotation or different isoforms, then  
646 ClustalW Multiple alignment in BioEdit version 7.0.5.3 was used for amino acids  
647 sequence alignment between Chines horseshoe bat (*Rhinolophus sinicus*) and the other  
648 species.

### 649 **Single-molecule fluorescent *in situ* hybridization**

650 Probe libraries were custom designed and constructed by Advanced Cell Diagnostics  
651 (ACD, Newark, CA) for bat SFTPC and CLDN5. The single molecule FISH probe  
652 libraries consisted of 20 probes with length of 50 bps. The probe libraries of SFTPC and  
653 CLDN5 were respectively coupled to HRP-C1 and HRP-C2, then stained with Opal™  
654 fluorescent reagents. The single cells were washed with DPBS, fixed in 10% neutral  
655 formalin buffer for 1h at 37 °C, then centrifuged at 250×g for 10 min and resuspended in  
656 70% ethanol for incubating at RT for 10 min and stored at 4°C. Adjust the cell density to  
657  $1 \times 10^6$  cells/ml. Cell suspension droplets were added onto the slices and dried, then  
658 incubated in 50% ethanol, 70% ethanol and 100% ethanol, for 5min at each step. The

659 slices were dried at 37°C for 30 min, then draw for 2- 4 times around the cell spot by  
660 using the hydrophobic barrier pen. The probes hybridizing was performed in accordance  
661 with the manufacturer's instructions by using RNAscope® Multiplex Fluorescent  
662 Reagent Kit v2 and hybridization oven (HybEZ™, ACD, Newark, CA). The cells were  
663 incubated with the Hybridize Probes, hybridize Amp 1, Amp 2 and Amp 3 at 40□ for 2h,  
664 30min, and 15min, respectively, then incubated with horseradish peroxidase (HRP)-C1  
665 and HRP-C2. The nucleus was stained with DAPI (Invitrogen, Waltham, MA, USA) for  
666 30 second and ProLong™ Gold antifade reagent was placed on the slices. Images were  
667 taken by using Vectra Polaris Automated Quantitative Pathology Imaging System  
668 (PerkinElmer, Waltham, MA, USA).

#### 669 **Cell culture.**

670 Primary bat pulmonary fibroblast (BPF) cells were cultured from one lung of the  
671 Chinese horseshoe bat (*Rhinolophus sinicus*). The lung was pretreated followed the same  
672 procedure of single cell preparation. The cells were suspended in Roswell Park Memorial  
673 Institute (RPMI) 1640 medium (Thermo Fisher Scientific, CA, USA) containing 10%  
674 fetal bovine serum (FBS) (Hyclone, Logan, UT, USA) and 1% penicillin (10,000 IU)  
675 -streptomycin (10,000μg/mL) (PS) (Thermo Fisher Scientific, CA, USA), then cultured  
676 in a 24-well culture plate for 48 h until the fibroblasts attached to the bottom of the plate.  
677 Then the culture medium was replaced by Fibroblast Medium (ScienCell, Carlsbad, CA,  
678 USA) containing 2% FBS and 1% PS. The BPF cells were tested by mycoplasma  
679 detection kit (Lonza, Walkersville, MD, USA). The cell type was confirmed by in situ  
680 hybridization using RNAscope® Probes (ACD) targeted to fibronectin 1 (*FNI*) and  
681 asporin (*ASPN*) genes.

682 **Cell lines and viruses**

683 Human Pulmonary Fibroblasts (HPFs, ScienCell, Carlsbad, CA, USA) are  
684 characterized by immunofluorescence with antibody specific to fibronectin (Santa Cruz,  
685 CA, USA) and Alexa Fluor 488-ligated second antibody (ZSGB-BIO, China). HPFs were  
686 cultured in Fibroblast Medium (ScienCell). Vesicular Stomatitis Virus (VSV) was stored  
687 in our lab and the viral titer was  $5.25 \times 10^9$  plaque forming unit (PFU) /ml.

688 **Quantitative reverse transcription PCR (qRT-PCR)**

689 BPFs and HPFs were cultured in 12-well plate ( $2.5 \times 10^5$  cells/well) and transfected with  
690 1  $\mu$ g poly (I:C) (InvivoGen, CA, USA) or 2  $\mu$ g ISD (InvivoGen, CA, USA) by  
691 lipofectamine 2000 reagent (Thermo Fisher Scientific, CA, USA), the culture medium  
692 was replaced with Opti-MEM™ Reduced Serum Medium (Thermo Fisher Scientific, NY,  
693 USA) after 4h transfection, and the cells were collected at 4 h, 8h, 12h and 24h post  
694 transfection. BPFs and HPFs were also stimulated with 10  $\mu$ g/ml of poly (I:C) or 2  $\mu$ g/ml  
695 of R848 (MCE, NJ, USA), or medium as control. Poly (I:C) low molecular weight (LMW)  
696 and high molecular weight (HMW) (InvivoGen, CA, USA) were used initially and they  
697 would stimulate the signaling pathway in the two cells. Then the poly (I:C) HMW was  
698 then used furtherly. For VSV infection, both cells were infected with VSV at MOI of 0.5.  
699 The cells in each well were collected at 4 h, 8h, 12h and 24h post stimulation or infection.  
700 RNA was isolated as described above. Total 500 ng RNA was used to synthesize cDNA  
701 by using Moloney-murine leukemia virus (M-MLV) reverse transcriptase (Promega,  
702 Madison, WI). Diluted cDNA was used in each quantitative reverse transcription-PCR  
703 (qRT-PCR). Primers used in qRT-PCR were listed in Supplementary material. The  
704 qRT-PCR was performed by using Bio-rad with real-time CFX96 amplifier

705 (Bio-Rad Laboratories, Inc., USA) using the TB Green<sup>TM</sup> Premix Ex Taq<sup>TM</sup> (TaKaRa,  
706 Japan). The primers targeted to human and bat IFN $\beta$ , IL-6, TNF $\alpha$ , RIG-I and MDA5  
707 were used. Fold change expression of genes were calculated by  $\Delta\Delta$ CT method. The mean  
708 value was from three replicates, and error bars represent standard deviations.

#### 709 **Data availability**

710 All gene expression data from single cell and bulk sequencing have deposited in the  
711 Genome Sequence Archive (GPB 2017) in National Genomics Data Center (NAR 2020),  
712 under project that is publicly accessible at <https://bigd.big.ac.cn/gsa>.

713

#### 714 **Acknowledgments**

715 We thank Dr. Zhuo Zhou (Peking University, Beijing, China) give us valuable  
716 suggestion to improve the paper. This study was funded in part by the Chinese Academy  
717 of Medical Sciences (CAMS) Innovation Fund for Medical Sciences (2016-I2M-1-014,  
718 2019-I2M-2-001), the National Major Science & Technology Project for Control and  
719 Prevention of Major Infectious Diseases in China (2017ZX10103004), the Non-profit  
720 Central Research Institute Fund of CAMS (2019PT310029), the Ministry of Science and  
721 Technology of China (2018YFA0108100), the National Natural Science Foundation of  
722 China (21525521, 21927802), Beijing Advanced Innovation Center for Genomics, and  
723 2018 Beijing Brain Initiative (Z181100001518004).

#### 724 **References**

- 725 1 Teeling, E. C. *et al.* A molecular phylogeny for bats illuminates biogeography and  
726 the fossil record. *Science* **307**, 580-584, doi:10.1126/science.1105113 (2005).
- 727 2 Teeling EC, V. S., Dávalos LM, Ray DA, Gilbert MTP, Myers E; Bat1K  
728 Consortium. Bat Biology, Genomes, and the Bat1K Project: To Generate

- 729 Chromosome-Level Genomes for All Living Bat Species. *Annu Rev Anim Biosci* **6**,  
730 23-46 (2018).
- 731 3 Brook, C. E. & Dobson, A. P. Bats as 'special' reservoirs for emerging zoonotic  
732 pathogens. *Trends Microbiol* **23**, 172-180, doi:10.1016/j.tim.2014.12.004 (2015).
- 733 4 Smith I, W. L. Bats and their virome: an important source of emerging viruses  
734 capable of infecting humans. *Curr Opin Virol* **3**, 84-91 (2013).
- 735 5 Ren, L. L. *et al.* Identification of a novel coronavirus causing severe pneumonia  
736 in human: a descriptive study. *Chin Med J (Engl)* **133**, 1015-1024,  
737 doi:10.1097/CM9.0000000000000722 (2020).
- 738 6 Coronavirus disease 2019 (COVID-19) Situation Report - 124 2020. World  
739 Health Organization. Accessed May 23, 2020.  
740 [https://www.who.int/docs/default-source/coronaviruse/situation-reports/20200523-](https://www.who.int/docs/default-source/coronaviruse/situation-reports/20200523-covid-19-sitrep-124.pdf?sfvrsn=9626d639_2)  
741 [-covid-19-sitrep-124.pdf?sfvrsn=9626d639\\_2](https://www.who.int/docs/default-source/coronaviruse/situation-reports/20200523-covid-19-sitrep-124.pdf?sfvrsn=9626d639_2). (2020).
- 742 7 Chen L, L. B., Yang J, Jin Q. DBatVir: the database of bat-associated viruses.  
743 *Database (Oxford)* **2014**, bau021 (2014 ).
- 744 8 Glennon EE, B. D., Peel AJ, Garnier R, Suu-Ire RD, Gibson L, Hayman DTS,  
745 Wood JLN, Cunningham AA, Plowright RK, Restif O. What is stirring in the  
746 reservoir? Modelling mechanisms of henipavirus circulation in fruit bat hosts.  
747 *Philos Trans R Soc Lond B Biol Sci* **374**, 20190021 (2019).
- 748 9 Papenfuss AT, B. M., Feng ZP, Tachedjian M, Crameri G, Cowled C, Ng J,  
749 Janardhana V, Field HE, Wang LF. The immune gene repertoire of an important  
750 viral reservoir, the Australian black flying fox. *BMC Genomics*. *BMC Genomics*  
751 **13**, 261 (2012 ).
- 752 10 Lee AK, K. K., Elliott O, Khiabani H, Nagle ER, Jones ME, Amman BR,  
753 Sanchez-Lockhart M, Towner JS, Palacios G, Rabadan R. De novo transcriptome  
754 reconstruction and annotation of the Egyptian rousette bat. *BMC Genomics* **16**,  
755 1033 (2015).
- 756 11 Pavlovich SS, L. S., Koroleva G, Guito JC, Arnold CE, Nagle ER, Kulcsar K, Lee  
757 A, Thibaud-Nissen F, Hume AJ, Mühlberger E, Uebelhoer LS, Towner JS,  
758 Rabadan R, Sanchez-Lockhart M, Kepler TB, & G, P. The Egyptian Rousette  
759 Genome Reveals Unexpected Features of Bat Antiviral Immunity. *Cell* **173**,

- 760 1098-1110.e1018. (2018).
- 761 12 Zhang G, C. C., Shi Z, Huang Z, Bishop-Lilly KA, Fang X, Wynne JW, Xiong Z,  
762 Baker ML, Zhao W, Tachedjian M, Zhu Y, Zhou P, Jiang X, Ng J, Yang L, Wu L,  
763 Xiao J, Feng Y, Chen Y, Sun X, Zhang Y, Marsh GA, Cramer G, Broder CC, Frey  
764 KG, Wang LF, Wang J. Comparative analysis of bat genomes provides insight into  
765 the evolution of flight and immunity. *Science* **339**, 456-460 (2013).
- 766 13 Consortium, T. T. M. Single-cell transcriptomics of 20 mouse organs creates a  
767 Tabula Muris. *Nature* **562**, 367-372 (2018).
- 768 14 Han X, W. R., Zhou Y, Fei L, Sun H, Lai S, Saadatpour A, Zhou Z, Chen H, Ye F,  
769 Huang D, Xu Y, Huang W, Jiang M, Jiang X, Mao J, Chen Y, Lu C, Xie J, Fang Q,  
770 Wang Y, Yue R, Li T, Huang H, Orkin SH, Yuan GC, Chen M, Guo G. Mapping  
771 the Mouse Cell Atlas by Microwell-Seq. **172**, 1091-1107.e1017 (2018).
- 772 15 Han, X. *et al.* Construction of a human cell landscape at single-cell level. *Nature*  
773 **581**, 303-309, doi:10.1038/s41586-020-2157-4 (2020).
- 774 16 **Masters PS, P. S. C. I. K. D., Howley PM, editors. Fields Virology, Sixth**  
775 **edition. Lippcott: Williams &Wilkins.** 825-858 (2013).
- 776 17 Yeager, C. L. *et al.* Human aminopeptidase N is a receptor for human coronavirus  
777 229E. *Nature* **357**, 420-422, doi:10.1038/357420a0 (1992).
- 778 18 Kobayashi, T. *et al.* Characterization of a novel species of adenovirus from  
779 Japanese microbat and role of CXADR as its entry factor. *Sci Rep* **9**, 573,  
780 doi:10.1038/s41598-018-37224-z (2019).
- 781 19 Wong KT, S. W., Kumar S, Norain K, Abdullah W, Guarner J, Goldsmith CS,  
782 Chua KB, Lam SK, Tan CT, Goh KJ, Chong HT, Jusoh R, Rollin PE, Ksiazek TG,  
783 Zaki SR; Nipah Virus Pathology Working Group. Nipah virus infection:  
784 pathology and pathogenesis of an emerging paramyxoviral zoonosis. *Am J Pathol*  
785 **161**, 2153-2167 (2002).
- 786 20 Geisbert TW, H. L., Larsen T, Young HA, Reed DS, Geisbert JB, Scott DP, Kagan  
787 E, Jahrling PB, Davis KJ. Pathogenesis of Ebola hemorrhagic fever in  
788 cynomolgus macaques: evidence that dendritic cells are early and sustained  
789 targets of infection. *Am J Pathol* **163**, 2347-2370 ( 2003).
- 790 21 Yang, L. *et al.* Deleted in azoospermia-associated protein 2 regulates innate

- 791 immunity by stimulating Hippo signaling in crab. *J Biol Chem* **294**, 14704-14716,  
792 doi:10.1074/jbc.RA119.009559 (2019).
- 793 22 Crowl, J. T. & Stetson, D. B. SUMO2 and SUMO3 redundantly prevent a  
794 noncanonical type I interferon response. *Proc Natl Acad Sci U S A* **115**,  
795 6798-6803, doi:10.1073/pnas.1802114115 (2018).
- 796 23 Lu, M. *et al.* The novel gene EG-1 stimulates cellular proliferation. *Cancer Res*  
797 **65**, 6159-6166, doi:10.1158/0008-5472.CAN-04-4016 (2005).
- 798 24 Pei, J. *et al.* TMED3 promotes cell proliferation and motility in breast cancer and  
799 is negatively modulated by miR-188-3p. *Cancer Cell Int* **19**, 75,  
800 doi:10.1186/s12935-019-0791-4 (2019).
- 801 25 Zhang, S., Gao, M. & Yu, L. GATAD1 gene amplification promotes glioma  
802 malignancy by directly regulating CCND1 transcription. *Cancer Med* **8**,  
803 5242-5253, doi:10.1002/cam4.2405 (2019).
- 804 26 Xu, X. *et al.* Cathepsin L protects mice from mycoplasmal infection and is  
805 essential for airway lymphangiogenesis. *Am J Respir Cell Mol Biol* **49**, 437-444,  
806 doi:10.1165/rcmb.2013-0016OC (2013).
- 807 27 Wille, A. *et al.* Functional consequences of cathepsin L deficiency in human lung  
808 epithelial cells. *Biol Chem* **383**, 1291-1296, doi:10.1515/BC.2002.145 (2002).
- 809 28 Grandea, A. G., 3rd *et al.* Impaired assembly yet normal trafficking of MHC class  
810 I molecules in Tapasin mutant mice. *Immunity* **13**, 213-222,  
811 doi:10.1016/s1074-7613(00)00021-2 (2000).
- 812 29 Garcia-Mata, R., Boulter, E. & Burridge, K. The 'invisible hand': regulation of  
813 RHO GTPases by RHOGDIs. *Nat Rev Mol Cell Biol* **12**, 493-504,  
814 doi:10.1038/nrm3153 (2011).
- 815 30 Ozaki, K. *et al.* A functional SNP in PSMA6 confers risk of myocardial infarction  
816 in the Japanese population. *Nat Genet* **38**, 921-925, doi:10.1038/ng1846 (2006).
- 817 31 Khaminets, A., Behl, C. & Dikic, I. Ubiquitin-Dependent And Independent  
818 Signals In Selective Autophagy. *Trends Cell Biol* **26**, 6-16,  
819 doi:10.1016/j.tcb.2015.08.010 (2016).
- 820 32 Tanaka, Y. *et al.* Differential Prognostic Relevance of Promoter DNA Methylation  
821 of CDO1 and HOPX in Primary Breast Cancer. *Anticancer Res* **39**, 2289-2298,



- 822           doi:10.21873/anticanres.13345 (2019).
- 823   33    Gupta, S. K., Haigh, B. J., Griffin, F. J. & Wheeler, T. T. The mammalian secreted  
824           RNases: mechanisms of action in host defence. *Innate Immun* **19**, 86-97,  
825           doi:10.1177/1753425912446955 (2013).
- 826   34    Hackett, B. A. *et al.* RNASEK is required for internalization of diverse  
827           acid-dependent viruses. *Proc Natl Acad Sci U S A* **112**, 7797-7802,  
828           doi:10.1073/pnas.1424098112 (2015).
- 829   35    Ryter, S. W. & Choi, A. M. Heme oxygenase-1/carbon monoxide: from  
830           metabolism to molecular therapy. *Am J Respir Cell Mol Biol* **41**, 251-260,  
831           doi:10.1165/rcmb.2009-0170TR (2009).
- 832   36    El Kalamouni, C. *et al.* Subversion of the Heme Oxygenase-1 Antiviral Activity  
833           by Zika Virus. *Viruses* **11**, doi:10.3390/v11010002 (2018).
- 834   37    Wolf FA, A. P., Theis FJ. SCANPY: large-scale single-cell gene expression data  
835           analysis. *Genome Biol* **19**, 15 (2018 ).
- 836   38    Förster R1, D.-M. A., Rot A. CCR7 and its ligands: balancing immunity and  
837           tolerance. *Nat Rev Immunol* **8**, 362-371 (2008).
- 838   39    Böttcher JP, B. E., Chakravarty P, Blees H, Cabeza-Cabrerizo M, Sammiceli S,  
839           Rogers NC, Sahai E, Zelenay S, Reis e Sousa C. NK Cells Stimulate Recruitment  
840           of cDC1 into the Tumor Microenvironment Promoting Cancer Immune Control.  
841           *Cell* **172**, 1022-1037.e1014 ( 2018).
- 842   40    Cheroutre H, L. F., Mucida D. The light and dark sides of intestinal intraepithelial  
843           lymphocytes. *Nat Rev Immunol* **11**, 445-456 (2011).
- 844   41    Malik BT, B. K., Vella JL, Zhang P, Shabaneh TB, Steinberg SM, Molodtsov AK,  
845           Bowers JS, Angeles CV, Paulos CM, Huang YH, Turk MJ. Resident memory T  
846           cells in the skin mediate durable immunity to melanoma. *Sci Immunol* **2**, pii:  
847           eaam6346 (2017).
- 848   42    Shimizu K, S. Y., Shinga J, Watanabe T, Endo T, Asakura M, Yamasaki S,  
849           Kawahara K, Kinjo Y, Kitamura H, Watarai H, Ishii Y, Tsuji M, Taniguchi M,  
850           Ohara O, Fujii S. KLRG+ invariant natural killer T cells are long-lived effectors.  
851           *Proc Natl Acad Sci U S A*. **111**, 12474-12479 (2014 ).
- 852   43    Jones, K. E. *et al.* Global trends in emerging infectious diseases. *Nature* **451**,



- 853 990-993, doi:10.1038/nature06536 (2008).
- 854 44 Hedenstrom, A. & Johansson, L. C. Bat flight: aerodynamics, kinematics and  
855 flight morphology. *J Exp Biol* **218**, 653-663, doi:10.1242/jeb.031203 (2015).
- 856 45 O'Shea TJ, C. P., Cunningham AA, Fooks AR, Hayman DT, Luis AD, Peel AJ,  
857 Plowright RK, Wood JL. Bat flight and zoonotic viruses. *Emerg Infect Dis* **20**,  
858 741-745 (2014).
- 859 46 Wu, Z. *et al.* Deciphering the bat virome catalog to better understand the  
860 ecological diversity of bat viruses and the bat origin of emerging infectious  
861 diseases. *ISME J* **10**, 609-620, doi:10.1038/ismej.2015.138 (2016).
- 862 47 Dobson, A. P. Virology. What links bats to emerging infectious diseases? *Science*  
863 **310**, 628-629, doi:10.1126/science.1120872 (2005).
- 864 48 Schneider, D. S. & Ayres, J. S. Two ways to survive infection: what resistance and  
865 tolerance can teach us about treating infectious diseases. *Nat Rev Immunol* **8**,  
866 889-895, doi:10.1038/nri2432 (2008).
- 867 49 Zaki, S. R. & Goldsmith, C. S. Pathologic features of filovirus infections in  
868 humans. *Curr Top Microbiol Immunol* **235**, 97-116,  
869 doi:10.1007/978-3-642-59949-1\_7 (1999).
- 870 50 Ryabchikova EI, K. L., Luchko SV. An analysis of features of pathogenesis in two  
871 animal models of Ebola virus infection. *J Infect Dis* **179**, S199-S202 (1999).
- 872 51 Gu J, K. C. Pathology and pathogenesis of severe acute respiratory syndrome. *Am*  
873 *J Pathol* **170**, 1136-1147 (2007).
- 874 52 Olson JA, M.-H. C., Jameson SC, Hamilton SE. Effector-like CD8<sup>+</sup> T cells in the  
875 memory population mediate potent protective immunityEffector-like CD8<sup>+</sup> T  
876 cells in the memory population mediate potent protective immunity. *Immunity* **38**,  
877 1250-1260 ( 2013).
- 878 53 Mackay, L. K. *et al.* Long-lived epithelial immunity by tissue-resident memory T  
879 (TRM) cells in the absence of persisting local antigen presentation. *Proc Natl*  
880 *Acad Sci U S A* **109**, 7037-7042, doi:10.1073/pnas.1202288109 (2012).
- 881 54 Malireddi RK, K. T. Role of type I interferons in inflammasome activation, cell  
882 death, and disease during microbial infection. *Front Cell Infect Microbiol* **3**, 77  
883 ( 2013).

- 884 55 Zhou P, T. M., Wynne JW, Boyd V, Cui J, Smith I, Cowled C, Ng JH, Mok L,  
885 Michalski WP, Mendenhall IH, Tachedjian G, Wang LF, Baker ML. Contraction  
886 of the type I IFN locus and unusual constitutive expression of IFN- $\alpha$  in bats. *Proc*  
887 *Natl Acad Sci U S A* **113**, 2696-2701 (2016).
- 888 56 Mandl, J. N., Schneider, C., Schneider, D. S. & Baker, M. L. Going to Bat(s) for  
889 Studies of Disease Tolerance. *Front Immunol* **9**, 2112,  
890 doi:10.3389/fimmu.2018.02112 (2018).
- 891 57 Li, J. *et al.* Molecular characterization of RIG-I, STAT-1 and IFN-beta in the  
892 horseshoe bat. *Gene* **561**, 115-123, doi:10.1016/j.gene.2015.02.013 (2015).
- 893 58 Yu G, W. L., Han Y, He QY. clusterProfiler: an R package for comparing  
894 biological themes among gene clusters. *OMICS* **16**, 284-287 (2012).

895

#### 896 **Author contributions**

897 JWW, JBW, YYH, and LLR conceived and designed experiments. CHW, YX, LLH,  
898 ZQW and XX performed the experiments. CW, JCY, LLR, AOP, LG, JBW, YYH, HPW,  
899 LLH, HZ, CHW, YWL, JCZ, LSS, MKL and XBL analyzed the data. LLR, LG, CHW,  
900 YYH, JBW, SRQ and JWW wrote the manuscript. All authors reviewed the manuscript.

#### 901 **Conflict of Interest Disclosures**

902 All authors declare no competing interests.

#### 903 **Role of the Funder/Sponsor**

904 The funders had no role in the design and conduct of the study; collection,  
905 management, analysis, and interpretation of the data; preparation, review, or approval of  
906 the manuscript; and decision to submit the manuscript for publication.

907 **Figure legend**

908 **Figure 1. Overview of Chinese horseshoe bat cell atlas.** a, Work flow of single cell  
909 sequencing. Cells from two male bat organs were processed for transcriptomic  
910 amplification, sequencing and data analyzing. b, The expression level of viral receptor  
911 genes across organs based on bulk-seq data between bat, human and mouse. The size of  
912 circle represents the gene expression level and the colors showed the species. c, Axis on  
913 the triangular representation of the distributions of viral receptor genes across the organs  
914 in bat, human and mouse. The size of the signals represents the mean gene expression  
915 showed as  $\ln(\text{expression} + 1)$ . d, UMAP plots of all cells, colored by organ, overlaid  
916 with the predominant cell type composing each cluster,  $n = 82,924$  individual cells. e,  
917 The number of annotated cell types in each organ.

918

919 **Figure 2. Differential expressions of bat lung cells compared to human and mouse,**  
920 **and the distribution of viral receptor genes across cell types.** a, UMAP visualization  
921 and marker-based annotation of lung cells. Cells are colored by cell-type. b, Comparisons  
922 of the differential genes expressed in endothelial cells, epithelia cells, mesenchymal cells,  
923 and immune cells in bat compared to that of human and mouse. Differential expressed  
924 genes with  $p\text{-adjust} \leq 0.05$  were analyzed. Results are visualized by heatmaps of  
925 normalized gene expression and histograms of fold change between cell types. c, Violin  
926 plots of viral receptor genes expression in top 5 cell types.

927

928 **Figure 3. Analysis of bat T and B cells.**

929 a, UMAP visualization of all T cells from Chinese horseshoe bats (*Rhinolophus sinicus*),

930 showing the formation of 13 main clusters shown in different colors. The functional  
931 description of each cluster is determined by the gene expression characteristics of each  
932 cluster. n = 9,663 individual cells. b, Violin plots showing the enriched transcripts of  
933 different T cell clusters. c, Violin plots showing the enriched transcripts of  
934  $T_{RM}\text{-GZMA}^{\text{high}}$ ,  $T_{RM}\text{-ZNF683}^{\text{high}}$ , and IEL. d, UMAP visualization of NKT-like-1,  
935 NKT-like-2, and NKT-like-3 cells. Colors indicate different organs, and shapes indicate  
936 cell types. e, UMAP plots showing expression of selected long-lived effector genes and  
937 immediate early genes (IEGs) in this dataset. f, Violin plots showing the enriched  
938 transcripts of NKT-like-1, NKT-like-2, and NKT-like-3 cells. g, Tissue preference of  
939 each NKT-like cell cluster estimated by proportion. h, UMAP visualization of B cells  
940 from Chinese horseshoe bats (*Rhinolophus sinicus*), showing the formation of 10 main  
941 clusters shown in different organs. The functional description of each cluster is  
942 determined by the differential expressed genes. i, Dot plot visualization of selected  
943 marker gene for each cell type. The size of the dot encodes the percentage of cells within  
944 a cell type in which that marker gene was detected, and the color encodes the average  
945 expression level. j, Distribution of B cell types in different organs.

946

947 **Figure 4. Expression levels of type I interferon in bat primary lung fibroblast.** a,  
948 Work flow of bat pulmonary primary fibroblast isolation. b, Cell type confirmation by  
949 single-molecule fluorescence in situ hybridization with fibronectin 1 RNA probe. c,  
950 Expressions levels of MDA5, RIG-I, IFN $\beta$  after the transfection of poly (I:C). d,  
951 Expressions levels of IL-6, TNF $\alpha$  after the transfection of B848. e, Expressions levels of  
952 IL-6 and IFN $\beta$  after the inoculations of poly (I:C). f, Expressions levels of MDA5, RIG-I,

953 IFN $\beta$ , IL-6, and TNF $\alpha$  after the infection of vesicular stomatitis virus (VSV). Error bars

954 represent standard deviation.

955

956

957 **Extended Data**

958 **Extended Data Figure 1. Transcriptomic analysis by bulk sequencing and the**  
959 **comparisons to single cell sequencing.** a, Expression level of selected viral receptor  
960 genes in organs based on bulk-seq data of bat and human. Adv: Adenovirus; RSV:  
961 Respiratory syncytial virus; MV: measles virus; CAV: Coxsackie virus; CAV-A9:  
962 Coxsackie virus A9; CAV-A16: Coxsackie virus A16; CAV-A13/18/21: Coxsackie virus  
963 A13/18/21; HRV: Rhinovirus; EchoV: Echovirus; DENV: Dengue virus; EV-B:  
964 Enterovirus B; HSV-1: Herpes simplex virus; HCMV: human cytomegalovirus; VZV:  
965 Varicella zoster virus; VSV: Vesicular stomatitis virus. b, Histogram of the number of  
966 detected genes (left) and UMIs (right) per cell for each organ. c, Dot plot visualization of  
967 differentially expressed genes across clustered cells. d, The comparison of differential  
968 transcriptional genes between bulk-seq and single cell (sc)-seq data in each organ.

969

970 **Extended Data Figure 2. Analysis of the cell types and receptor genes distribution**  
971 **patterns in single cell level.** a, UMAP plots of expression for genes specifically  
972 expressed in particular cell types (SFTPC in AT2 and CLDN5 in endothelial cells). Gene  
973 expression levels are indicated by shades of red. b, Single-molecule fluorescence in situ  
974 hybridization of SFTPC (Opal 520) and CLDN5 (Opal 690) on lung single cells droplet  
975 slices. c, Dot plot visualization of selected marker genes for each cell type. The size of  
976 the dot encodes the percentage of cells within a cell type in which that marker was  
977 detected, and the color encodes the average expression level. d, UMAP visualization and  
978 marker-based annotation of trachea cells. Cells are colored by cell-type. e, UMAP  
979 visualization and marker-based annotation of kidney cells. Cells are colored by cell-type.

980 f, UMAP visualization and marker-based annotation of intestine cells. Cells are colored  
981 by cell-type. g, Comparisons of the expression patterns of the respiratory virus receptor  
982 genes, *ACE2*, *DPP4*, *ANPEP*, *CXADR* and the *TMPRSS2* in endothelial cells, epithelia  
983 cells, and mesenchymal cells in single cell levels in bat compared to that of human and  
984 mouse. Only epithelial cells in intestine and kidney were selected for the comparisons  
985 according to the available data. SARS-CoV, Severe acute respiratory syncytial virus;  
986 HCoV, Human coronavirus; Adv: Adenovirus; CAV: Coxsackie virus.

987

988 **Extended Data Figure 3. The known human viral receptors genes expressed in bat**  
989 **across the cell types.** Dot plots of expression for viral receptor genes in featured cell  
990 types. The size of the dot encodes the percentage of cells within a cell type in which that  
991 marker was detected, and the color encodes the average expression level.

992

993 **Extended Data Figure 4. Summary of functional properties of various T cell clusters.**

994 a, Heatmap of unique signature genes for thirteen T cell clusters. Selective specifically  
995 expressed genes are marked alongside. b, UMAP plots of expression levels of selected  
996 genes in different clusters indicated by the colored oval corresponding to Figure 3a. c,  
997 Overview of T cell cluster characteristics. d, The number of activated T cells and naïve T  
998 cells in different tissue.

999

1000 **Extended Data Figure 5. Analysis of mononuclear phagocytes.** a, UMAP visualization  
1001 of mononuclear phagocytes from Chinese horseshoe bats (*Rhinolophus sinicus*), showing  
1002 the formation of 13 main clusters shown in different organs. The functional description of

1003 each cluster is determined by the gene expression characteristics of each cluster. b, Dot  
1004 plot visualization of each cell type and selected marker gene. The size of the dot encodes  
1005 the percentage of cells within a cell type in which that marker was detected, and the color  
1006 encodes the average expression level. c, Tissue preference of mononuclear phagocytes  
1007 estimated by proportion based on 10x data.d, Gene ontology analysis of macrophage with  
1008 high expressions of *CCL26*, *CD300*, *CSF1R*, *LYVE1* and *SPIC*.

1009

1010 **Extended Data Figure 6. Analysis of innate immune gene mRNA expression in**  
1011 **Chinese horseshoe bat tissues.** Tissue mRNA expression levels of RIG-I, MDA5, TLR3,  
1012 TLR7, TLR8, TLR9, IRF3, IRF7, IFN $\alpha$ , IFN $\beta$ , IFN $\omega$  and IFN $\gamma$  were determined by  
1013 qRT-PCR and normalised relative to GAPDH. Error bars represent standard deviation.

1014

1015 **Extended Data Figure 7. Heatmap of innate immune response genes expression in**  
1016 **lung epithelial cells, endothelial cells and stromal cells.**

1017

1018

1019

1020



1021 **Supplementary Material**

1022 KEY RESOURCES TABLE

| REAGENT or RESOURCE                   | SOURCE             | IDENTIFIER       |
|---------------------------------------|--------------------|------------------|
| Cell Lines                            |                    |                  |
| Human Pulmonary Fibroblasts           | ScienCell, CA, USA | Cat# 3300        |
| Critical Commercial Assays            |                    |                  |
| RNAscope® Probe-Rs-SFTPC-C1           | ACD, CA, USA       | Cat# 583421      |
| RNAscope®                             | ACD, CA, USA       | Cat# 583431-C2   |
| Probe-Rs-CLDN5-C2                     |                    |                  |
| RNAscope® 2-plex Negative             | ACD, CA, USA       | Cat# 320751      |
| Control Probe                         |                    |                  |
| RNAscope® Multiplex                   | ACD, CA, USA       | Cat# 323100      |
| Fluorescent Reagent Kit v2            |                    |                  |
| RNAscope® Probe-Rs-SFTPC-C1           | ACD, CA, USA       | Cat# 583421      |
| RNAscope® Probe-Rsi-ASPN              | ACD, CA, USA       | Cat# 826121      |
| RNAscope® Probe-Rsi-FN1-C2            | ACD, CA, USA       | Cat# 826111-C2   |
| RNAscope® Probe-Rsi-AQP5-C3           | ACD, CA, USA       | Cat# 826131-C3   |
| MycoAlert Mycoplasma Detection        | Lonza, ME, USA     | Cat# LT07-701    |
| Kit                                   |                    |                  |
| Enzymes, Culture medium and Chemicals |                    |                  |
| Collagenase/dispase                   | Roche, Germany     | Cat# 11097113001 |
| Collagenase II                        | Sigma, Israel      | Cat# C6885       |
| Collagenase IV                        | Sigma, Israel      | Cat# C5138       |

---

|                                                    |                                   |                |
|----------------------------------------------------|-----------------------------------|----------------|
| RQ1 RNase Free DNase                               | Promega, WI, USA                  | Cat# M610A     |
| Trypsin-EDTA (0.25%), phenol red                   | Thermo Fisher Scientific, NY, USA | Cat# 25200114  |
| BSA                                                | Sigma, Australia                  | Cat# B2064     |
| DPBS                                               | Thermo Fisher Scientific, NY, USA | Cat# 14190144  |
| Red blood cell lysis buffer                        | TBD, China                        | Cat# NH4CL2009 |
| HBSS                                               | Thermo Fisher Scientific, NY, USA | Cat# 14025092  |
| Trypan Blue solution                               | Sigma, UK                         | Cat# T8154     |
| 10% neutral formalin buffer                        | Slarbio, China                    | Cat# G2161     |
| EDTA (0.5M)                                        | Thermo Fisher Scientific, CA, USA | Cat# 15575020  |
| ProLong™ Gold antifade reagent                     | Thermo Fisher Scientific, OR, USA | Cat# P10144    |
| Fibroblast Medium (FM)                             | ScienCell, CA, USA                | Cat# 2301      |
| Mouse Anti-Fibronectin monoclonal antibody ( EP5 ) | SANTA CRUZ, TX, USA               | Cat# sc-8422   |
| M-MLV                                              | Promega, WI, USA                  | Cat# M1701     |
| Poly(I:C) low Molecular Weight (LMW)               | InvivoGen, CA, USA                | Cat# tlr-picw  |
| Poly(I:C) high Molecular Weight                    | InvivoGen, CA, USA                | Cat# tlr-pic   |

---

---

|                                                              |                                      |                          |
|--------------------------------------------------------------|--------------------------------------|--------------------------|
| (HMW)                                                        |                                      |                          |
| R848                                                         | MCE, NJ, USA                         | Cat#HY-13740/CS-1<br>706 |
| Lipofectamine™ 2000 reagent                                  | Thermo Fisher Scientific, CA,<br>USA | Cat# 11668019            |
| TB Green™ Premix Ex Taq™                                     | TaKaRa, China                        | Cat# RR420A              |
| Opti-MEM™ Reduced Serum<br>Medium                            | Thermo Fisher Scientific,<br>NY, USA | Cat# 31985088            |
| Roswell Park Memorial Institute<br>(RPMI) 1640 medium        | Thermo Fisher Scientific, NY,<br>USA | Cat# 21870-076           |
| Fetal bovine serum                                           | Hyclone, UT, USA                     | Cat# SH30396.03          |
| L-Glutamine                                                  | Thermo Fisher Scientific,<br>NY, USA | Cat# 25030081            |
| Penicillin-Streptomycin                                      | Thermo Fisher Scientific,<br>CA, USA | Cat# 15140122            |
| Alexa Fluor® 488 - Conjugated<br>Goat anti-Mouse IgG ( H+L ) | ZSGB-BIO, China                      | Cat# ZF-0512             |
| ISD Naked                                                    | InvivoGen, CA, USA                   | Cat# tlrl-isdn           |

---

|                                              |                 |                                                                                              |
|----------------------------------------------|-----------------|----------------------------------------------------------------------------------------------|
| Software and Algorithms                      |                 |                                                                                              |
| Matplotlib (Python package)<br>version 3.0.2 | NA              | <a href="https://pypi.org/project/matplotlib/">https://pypi.org/proje<br/>ct/matplotlib/</a> |
| Python                                       | Python Software | <a href="https://www.python.">https://www.python.</a>                                        |

---

---

|               |                  |                           |                                                                                             |
|---------------|------------------|---------------------------|---------------------------------------------------------------------------------------------|
| Scanpy        | (Python package) | F. Alexander Wolf et al., | <a href="https://pypi.org/project/scanpy/">https://pypi.org/project/scanpy/</a>             |
| version1.3.7  |                  | 2018                      |                                                                                             |
| Scikit-learn  | (Python package) | David Cournapeau et al.,  | <a href="https://pypi.org/project/scikit-learn/">https://pypi.org/project/scikit-learn/</a> |
| version0.20.2 |                  | 2007                      |                                                                                             |
| Seaborn       | (Python package) | NA                        | <a href="https://pypi.org/project/seaborn/">https://pypi.org/project/seaborn/</a>           |
| version0.9.0  |                  |                           |                                                                                             |

---

1023

1024 **Primers for qRT-PCR**

| Species                    | Target gene   | Primer sequence           |
|----------------------------|---------------|---------------------------|
| <i>Rhinolophus sinicus</i> | RIG-I         | F CTGCAAACACTGTGTGCGTCTC  |
|                            |               | R CCTGAAAAACTTCTGCGGCT    |
|                            | MDA5          | F CCTCTGAAAGCAATGCAGAAACT |
|                            |               | R GACTTGCCTGATCTGTGGCT    |
|                            | IFN- $\alpha$ | F GACGGGAGCCAGTTTGAGAA    |
|                            |               | R TAAGAGAGCCACTTGTGCCG    |
|                            | IFN- $\gamma$ | F CACGAAACGGACCCTGACTC    |
|                            |               | R AGTGGCTCAGAATGCAGACA    |
|                            | IFN- $\omega$ | F CACGAAACGGACCCTGACTC    |
|                            |               | R AGTGGCTCAGAATGCAGACA    |
|                            | IFN $\beta^1$ | F TCGTCTGGAGACAGCCTTGGAGG |
|                            |               | R TGGCTTTCAAGTGCCGCCTGAT  |
|                            | GAPDH         | F TTGTCAGCAATGCGTCCTGT    |

---

---

|               |   |                      |
|---------------|---|----------------------|
|               | R | AGTGATGGCATGGACTGTGG |
| IL-1 $\beta$  | F | AGAAGCTGAGGAACATGCCC |
|               | R | GCAGCTGACGGGTTCTTCTT |
| TNF- $\alpha$ | F | GGAAGAGTTCCCAGCTGACC |
|               | R | CTTGAGCTGTCCCTCGGTTT |
| IL-6          | F | AACTCCCTCTCCACAAGCAC |
|               | R | GGGGTAGGGAAAGCAGTAGC |
| TLR3          | F | AGCTCACAGGTGACGAATGG |
|               | R | GAAGACTTGGAACCGAGGCA |
| TLR7          | F | CCAAGGTGCTTTCCAGTTGC |
|               | R | ACCAGACAAACCACACAGCA |
| TLR8          | F | AACCTTTCCCAAGTGCCACA |
|               | R | TGACAATTGAAGCGCCTCCT |
| IRF3          | F | TTGAGGTGACCGCCTTCTAC |
|               | R | GTCTGGCAGTGTTACTGGCT |
| IRF7          | F | GAGCTTGGTCTTGACCTCCC |
|               | R | AAGCAGCGCTTCTACACCAA |

---

Homo sapiens

---

|               |   |                          |
|---------------|---|--------------------------|
| RIG-I         | F | AGAGCACTTGTGGACGCTT      |
|               | R | TGTTTTGCCACGTCCAGTCA     |
| MDA5          | F | TGCGCTTTCCCAGTGGATTA     |
|               | R | TTTGTTCAATTCTGTGTCATGGGT |
| IFN- $\alpha$ | F | GGGAGGTTGTCAGAGCAGAAA    |

---

---

|                   |   |                           |
|-------------------|---|---------------------------|
|                   | R | GGTGAGCTGGCATAACGAATC     |
| IFN- $\gamma^2$   | F | CCAACGCAAAGCAATACATGA     |
|                   | R | TTTTCGCTTCCCTGTTTTAGCT    |
| IFN- $\omega$     | F | GCCCATGTCATGTCTGTCCT      |
|                   | R | AAGCAGGTCTCCAGGTGTTG      |
| IFN $\beta$       | F | TAGCACTGGCTGGAATGAG       |
|                   | R | GTTTCGGAGGTAACCTGTAAG     |
| GAPDH             | F | CGGAGTCAACGGATTTGGTCGTA   |
|                   | R | AGCCTTCTCCATGGTGGTGAAGAC  |
| IL-1 $\beta$      | F | ACAGATGAAGTGCTCCTTCCA     |
|                   | R | GTCGGAGATTCGTAGCTGGAT     |
| TNF- $\alpha$     | F | CCCAGGGACCTCTCTCTAATC     |
|                   | R | ATGGGCTACAGGCTTGTCACT     |
| IL-6              | F | GCCCTGAGAAAGGAGACAT       |
|                   | R | CTGTTCTGGAGGTAAGTCTAGGTAT |
| TLR3 <sup>3</sup> | F | AGCCTTCAACGACTGATGCT      |
|                   | R | TTTCCAGAGCCGTGCTAAGT      |
| TLR7 <sup>3</sup> | F | AATGTCACAGCCGTCCCTAC      |
|                   | R | TTATTTTTACACGGCGCACA      |
| TLR8 <sup>3</sup> | F | TCCTTCAGTCGTCAATGCTG      |
|                   | R | CGTTTGGGGAACTTCCTGTA      |
| IRF3 <sup>3</sup> | F | GAGGTGACAGCCTTCTACCG      |
|                   | R | TGCCTCACGTAGCTCATCAC      |

---

---

|                   |   |                         |
|-------------------|---|-------------------------|
| IRF7 <sup>4</sup> | F | TGGTCCTGGTGAAGCTGGAA    |
|                   | R | GATGTCGTCATAGAGGCTGTTGG |

---

1025

1026 **References**

- 1027 1 Izaguirre, A. *et al.* Comparative analysis of IRF and IFN-alpha expression in  
1028 human plasmacytoid and monocyte-derived dendritic cells. *J Leukoc Biol* **74**,  
1029 1125-1138, doi:10.1189/jlb.0603255 (2003).
- 1030 2 Kanuri, G. *et al.* Expression of toll-like receptors 1-5 but not TLR 6-10 is elevated  
1031 in livers of patients with non-alcoholic fatty liver disease. *Liver Int* **35**, 562-568,  
1032 doi:10.1111/liv.12442 (2015).
- 1033 3 Li, J. *et al.* Molecular characterization of RIG-I, STAT-1 and IFN-beta in the  
1034 horseshoe bat. *Gene* **561**, 115-123, doi:10.1016/j.gene.2015.02.013 (2015).
- 1035 4 Moriconi, F. *et al.* The anti-TNF-alpha antibody infliximab indirectly regulates  
1036 PECAM-1 gene expression in two models of in vitro blood cell activation. *Lab*  
1037 *Invest* **92**, 166-177, doi:10.1038/labinvest.2011.160 (2012).
- 1038

**Figure 1. Overview of Chinese horseshoe bat cell atlas.** a, Work flow of single cell sequencing. Cells from two male bat organs were processed for transcriptomic amplification, sequencing and data analyzing. b, The expression level of viral receptor genes across organs based on bulk-seq data between bat, human and mouse. The size of circle represents the gene expression level and the colors showed the species. c, Axis on the triangular representation of the distributions of viral receptor genes across the organs in bat, human and mouse. The size of the signals represents the mean gene expression showed as  $\ln(\text{expression} + 1)$ . d, UMAP plots of all cells, colored by organ, overlaid with the predominant cell type composing each cluster,  $n = 82,924$  individual cells. e, The number of annotated cell types in each organ.

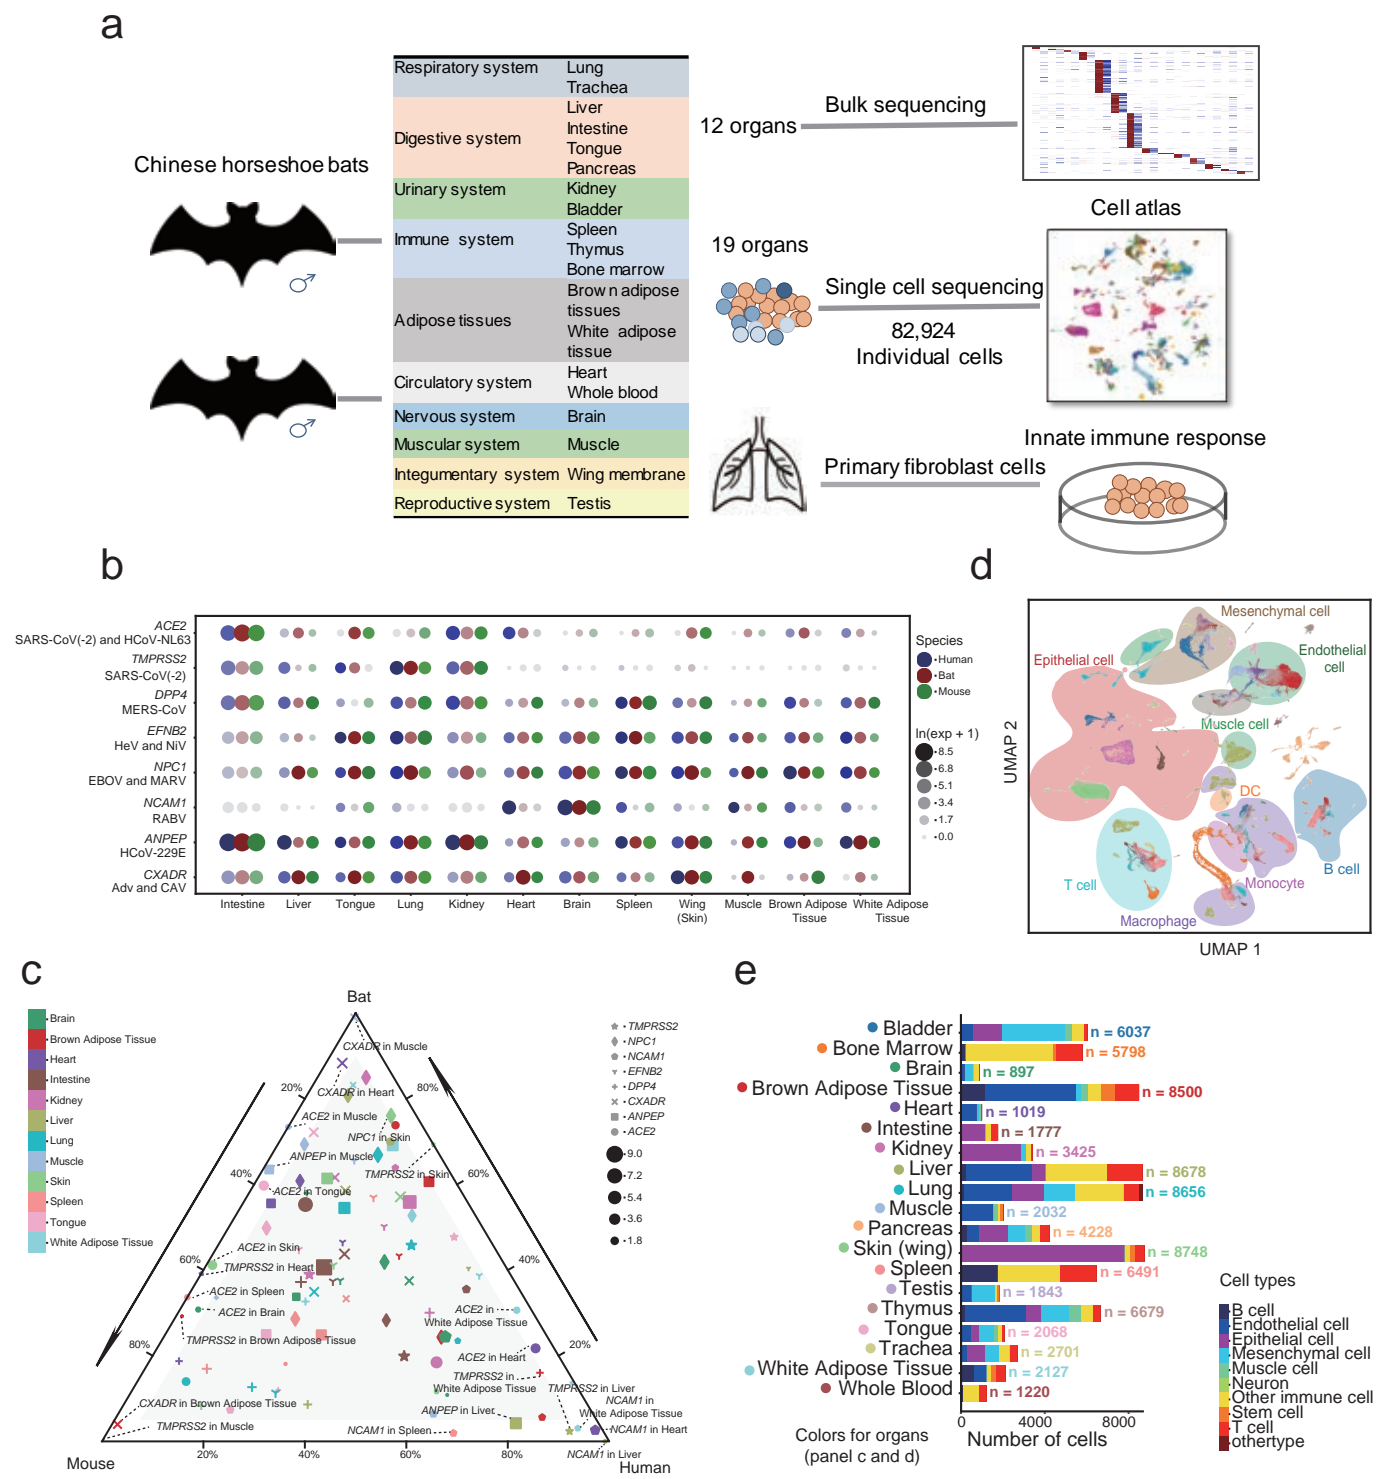



**Figure 2. Differential expressions of bat lung cells compared to human and mouse, and the distribution of viral receptor genes across cell types.** a, UMAP visualization and marker-based annotation of lung cells. Cells are colored by cell type. b, Comparisons of the differential genes expressed in endothelial cells, epithelia cells, mesenchymal cells, and immune cells in bat compared to that of human and mouse. Differential expressed genes with  $p\text{-adjust} \leq 0.05$  were analyzed. Results are visualized by heatmaps of normalized gene expression and histograms of fold change between cell types. c, Violin plots of viral receptor genes expression in top 5 cell types.

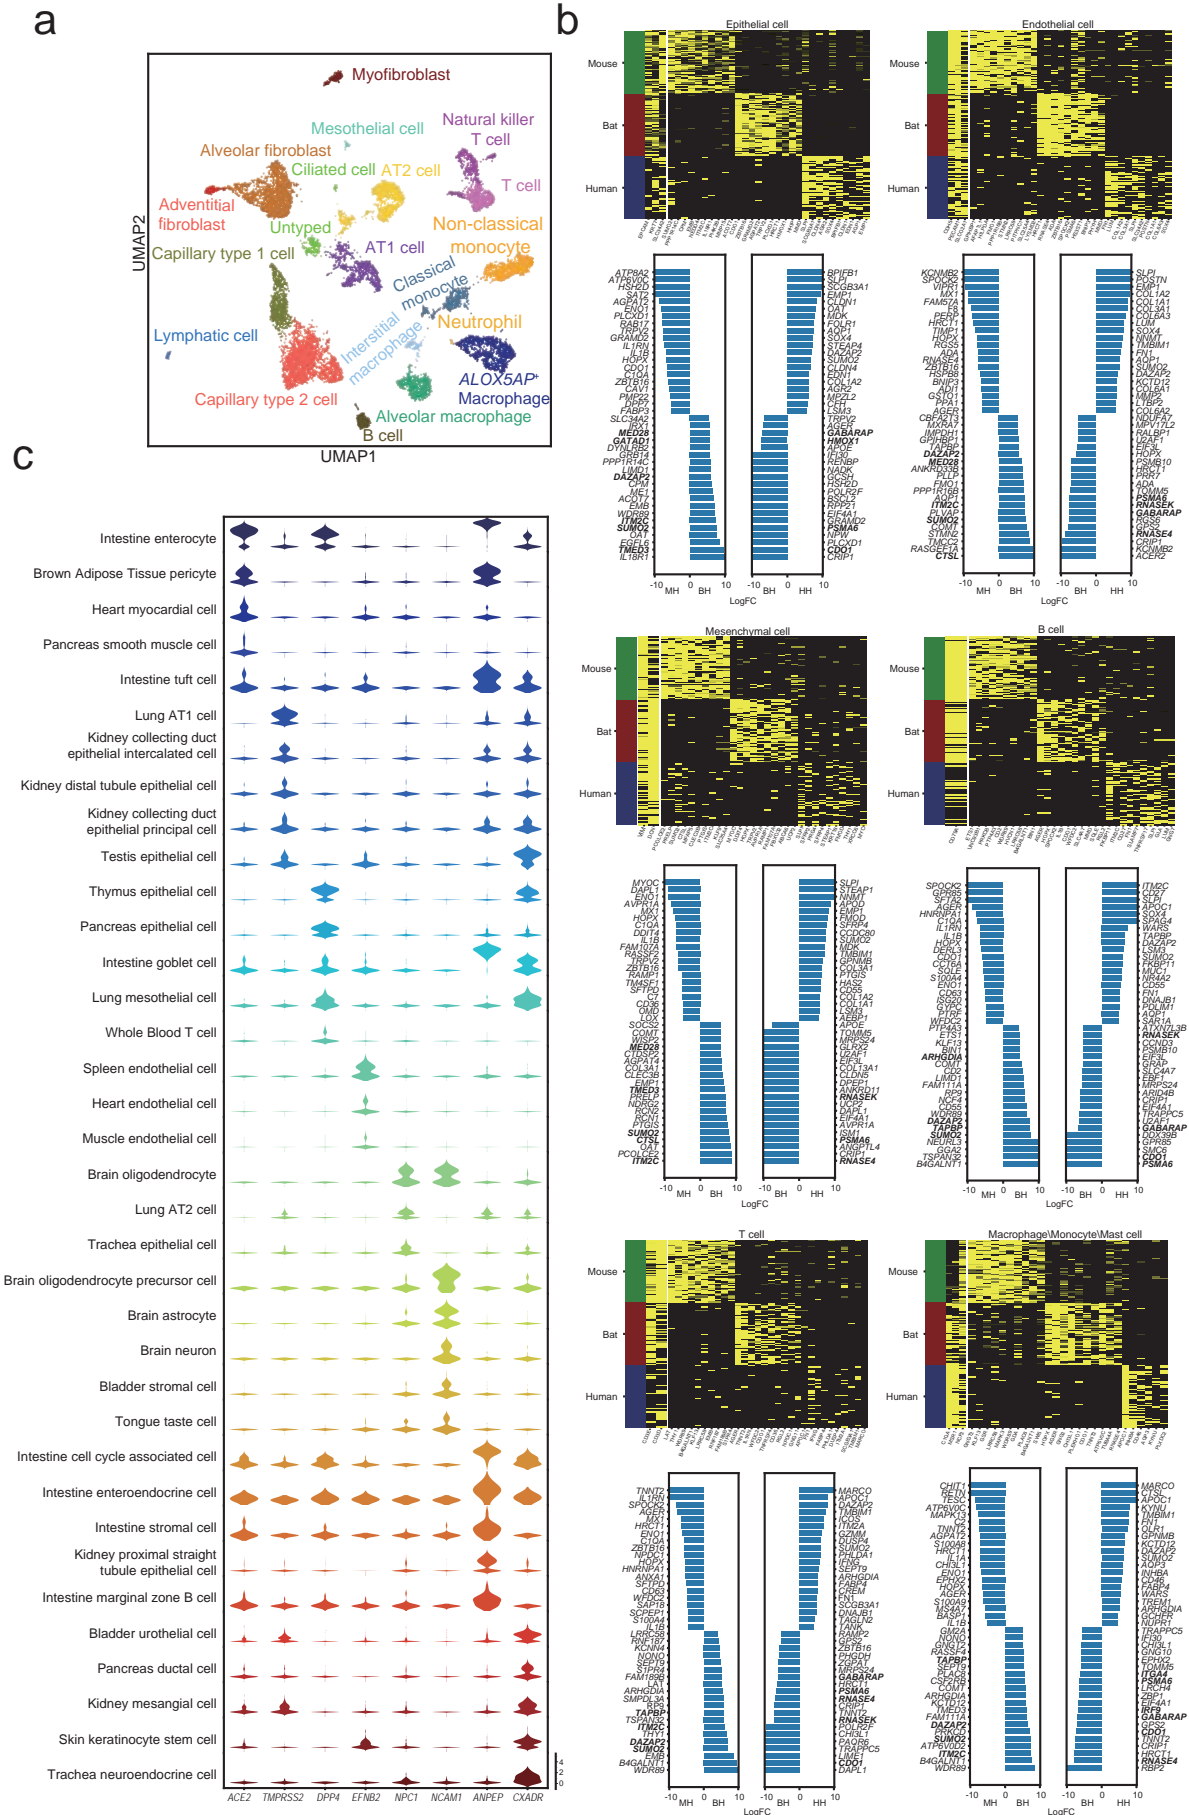

**Figure 3. Analysis of bat T and B cells.** a, UMAP visualization of all T cells from Chinese horseshoe bats, showing the formation of 13 main clusters shown in different colors. The functional description of each cluster is determined by the gene expression characteristics of each cluster. n = 9,663 individual cells. b, Violin plots showing the enriched transcripts of different T cell clusters. c, Violin plots showing the enriched transcripts of  $T_{RM-GZMA}^{high}$ ,  $T_{RM-ZNF683}^{high}$ , and IEL. d, UMAP visualization of NKT-like-1, NKT-like-2, and NKT-like-3 cells. Colors indicate different organs, and shapes indicate cell types. e, UMAP plots showing expression of selected long-lived effector genes and immediate early genes (IEGs) in this dataset. f, Violin plots showing the enriched transcripts of NKT-like-1, NKT-like-2, and NKT-like-3 cells. g, Tissue preference of each NKT-like cell cluster estimated by proportion. h, UMAP visualization of B cells from Chinese horseshoe bats, showing the formation of 10 main clusters shown in different organs. The functional description of each cluster is determined by the differential expressed genes. i, Dot plot visualization of selected marker gene for each cell type. The size of the dot encodes the percentage of cells within a cell type in which that marker gene was detected, and the color encodes the average expression level. j, Distribution of B cell types in different organs.

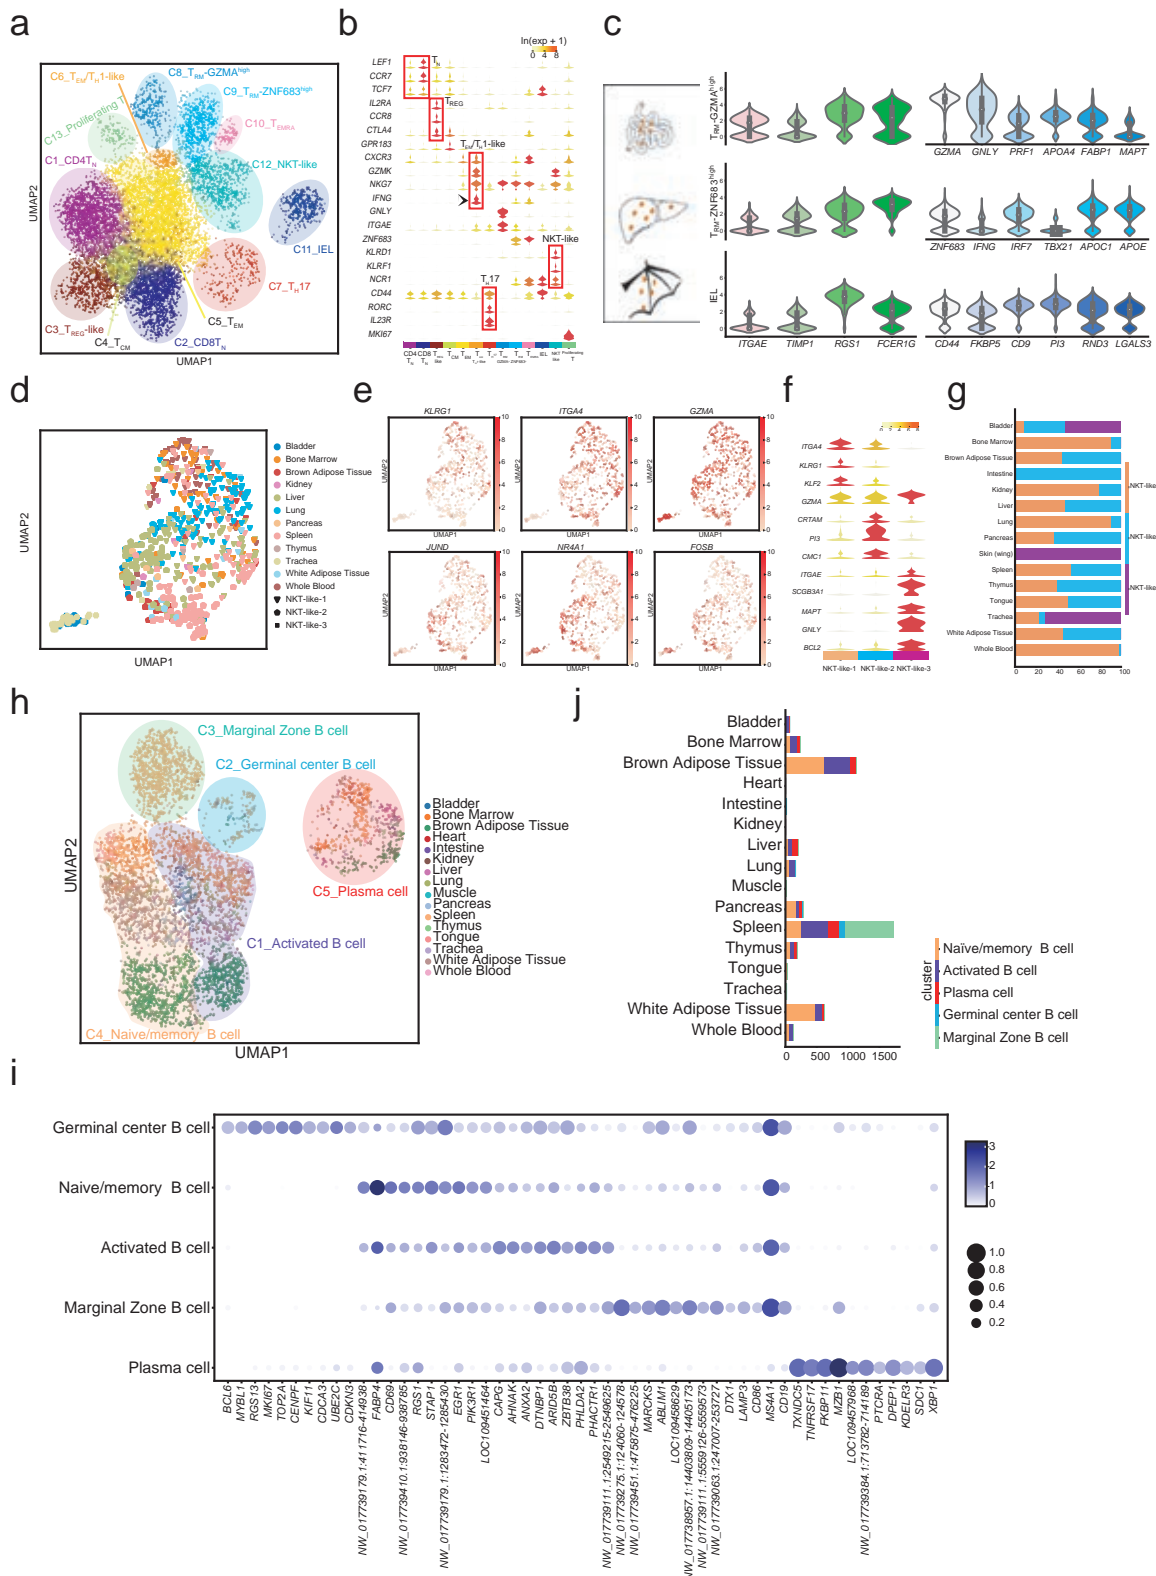

**Figure 4. Expression levels of type I interferon in bat primary lung fibroblast. a, Work flow of bat pulmonary**

**primary fibroblast isolation. b, Cell type confirmation by single-molecule fluorescence in situ hybridization with**

bioRxiv preprint doi: <https://doi.org/10.1101/2020.06.30.175778>; this version posted June 30, 2020. The copyright holder for this preprint (which was not certified by peer review) is the author/funder. All rights reserved. No reuse allowed without permission.

**fibronectin 1 RNA probe. c, Expressions levels of MDA5, RIG-I, IFN $\beta$  after the transfection of poly (I:C). d,**

**Expressions levels of IL-6, TNF $\alpha$  after the transfection of B848. e, Expressions levels of IL-6 and IFN $\beta$  after the**

**inoculations of poly (I:C). f, Expressions levels of MDA5, RIG-I, IFN $\beta$ , IL-6, and TNF $\alpha$  after the infection of**

**vesicular stomatitis virus (VSV). Error bars represent standard deviation.**

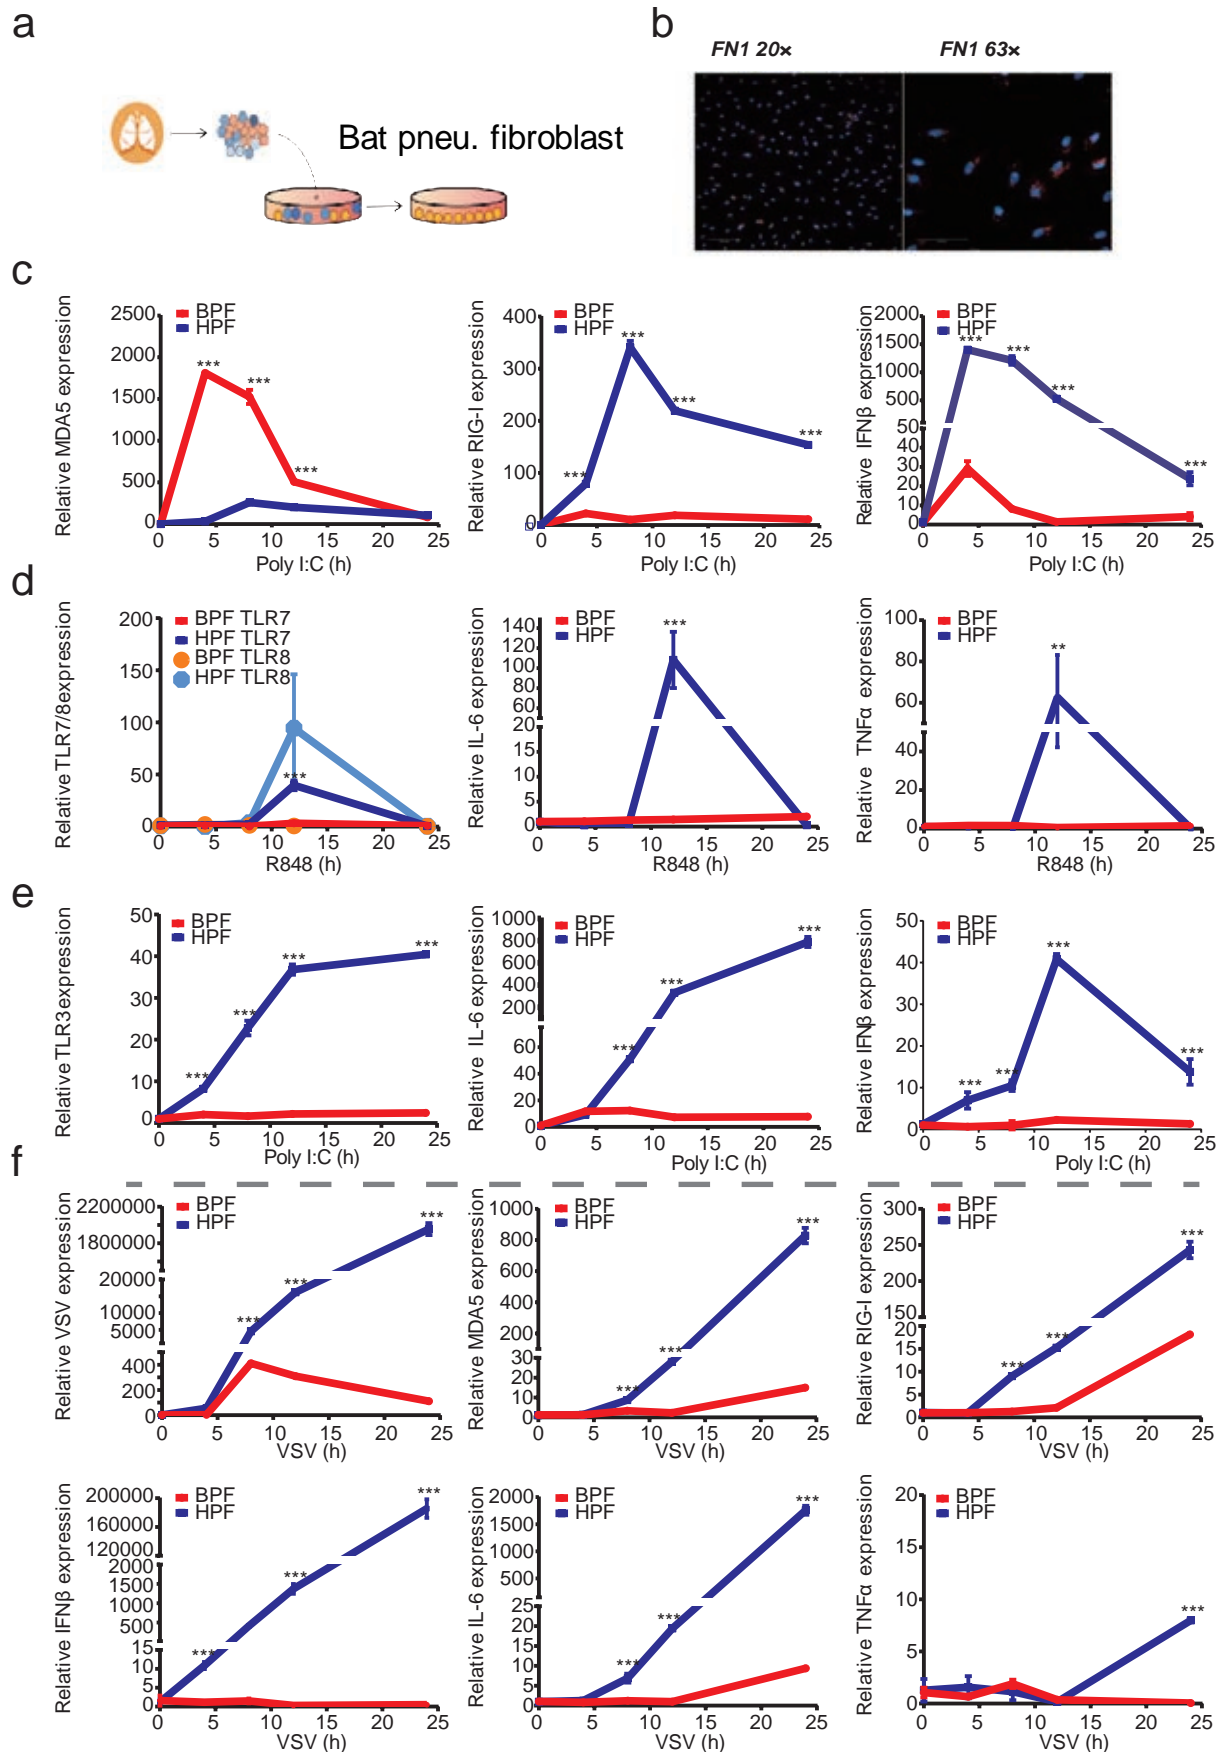

# Extended Data Figure 1. Transcriptomic analysis by bulk sequencing and the comparisons to single cell sequencing.

a, Expression level of selected viral receptor genes in organs based on bulk-seq data of bat and human.

Adv: Adenovirus; RSV: Respiratory syncytial virus; MV: measles virus; CAV: Coxsackie virus; CAV-A9: Coxsackie virus A9; CAV-A16: Coxsackie virus A16; CAV-A13/18/21: Coxsackie virus A13/18/21; HRV: Rhinovirus; EchoV: Echovirus; DENV: Dengue virus; EV-B: Enterovirus B; HSV-1: Herpes simplex virus; HCMV: human cytomegalovirus; VZV: Varicella zoster virus; VSV: Vesicular stomatitis virus.

b, Histogram of the number of detected genes (left) and UMIs (right) per cell for each organ. c, Dot plot visualization of differentially expressed genes across clustered cells. d, The comparison of differential transcriptional genes between bulk-seq and single cell (sc)-seq data in each organ.

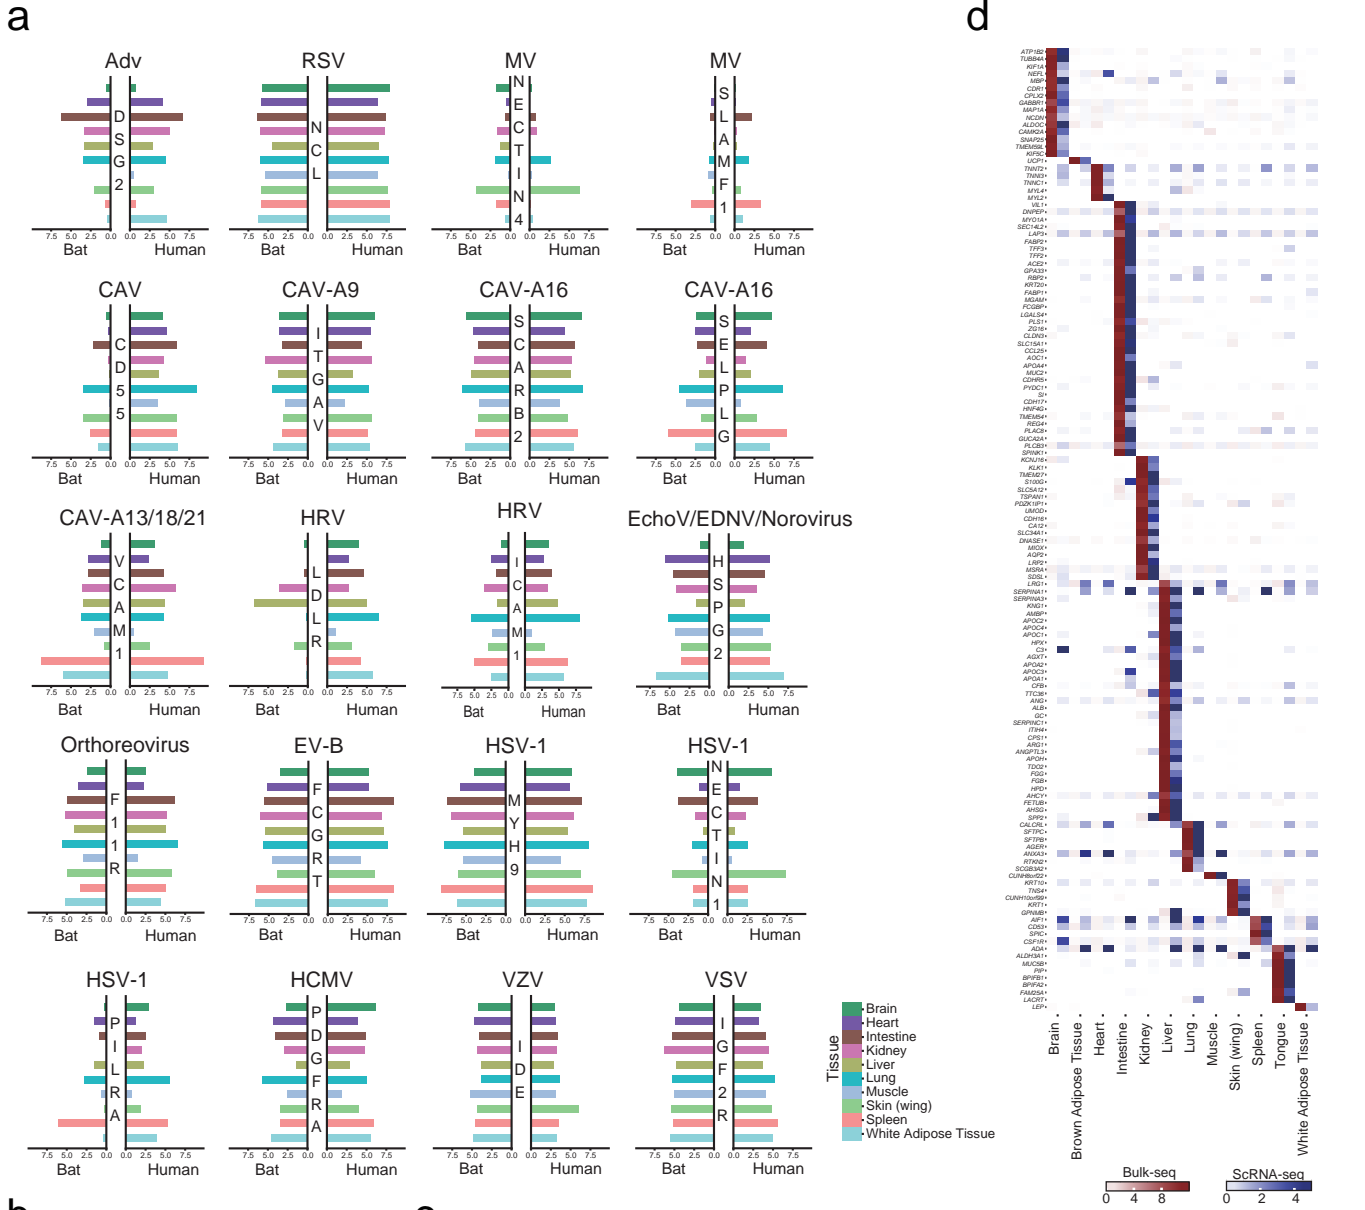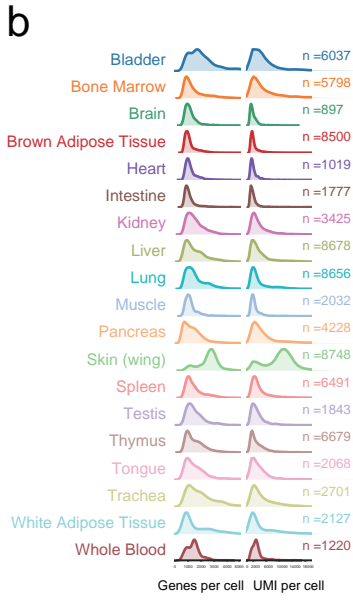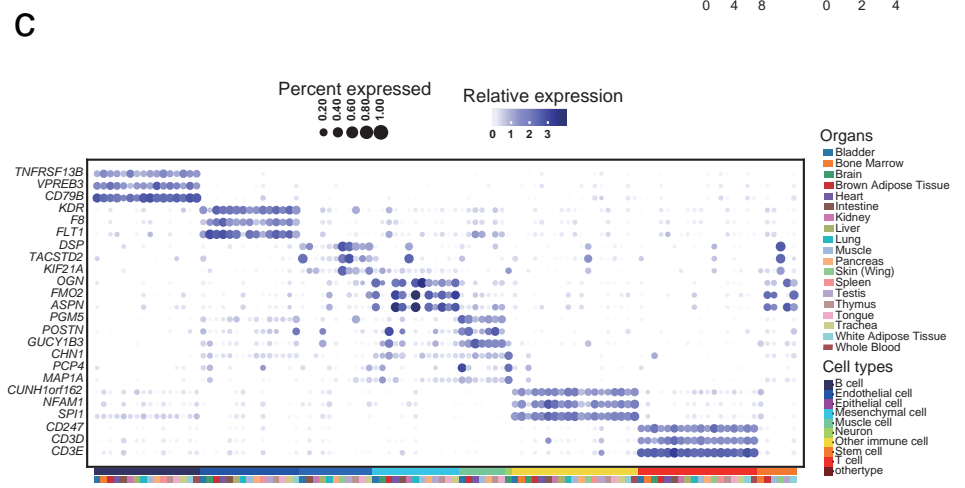

**Extended Data Figure 2. Analysis of the cell types and receptor genes distribution patterns in single cell level.** a, UMAP plots of expression for genes specifically expressed in particular cell types (SFTPC in AT2 and CLDN5 in endothelial cells). Gene expression levels are indicated by shades of red. b, Single-molecule fluorescence in situ hybridization of SFTPC (Opal 520) and CLDN5 (Opal 690) on lung single cells droplet slices. c, Dot plot visualization of selected marker genes for each cell type. The size of the dot encodes the percentage of cells within a cell type in which that marker was detected, and the color encodes the average expression level. d, UMAP visualization and marker-based annotation of trachea cells. Cells are colored by cell-type. e, UMAP visualization and marker-based annotation of kidney cells. Cells are colored by cell-type. f, UMAP visualization and marker-based annotation of intestine cells. Cells are colored by cell-type. g, Comparisons of the expression patterns of the respiratory virus receptor genes, ACE2, DPP4, ANPEP, CXADR and the TMPRSS2 in endothelial cells, epithelia cells, and mesenchymal cells in single cell levels in bat compared to that of human and mouse. Only epithelial cells in intestine and kidney were selected for the comparisons according to the available data. SARS-CoV, Severe acute respiratory syncytial virus; HCoV, Human coronavirus; Adv: Adenovirus; CAV: Coxsackie virus.

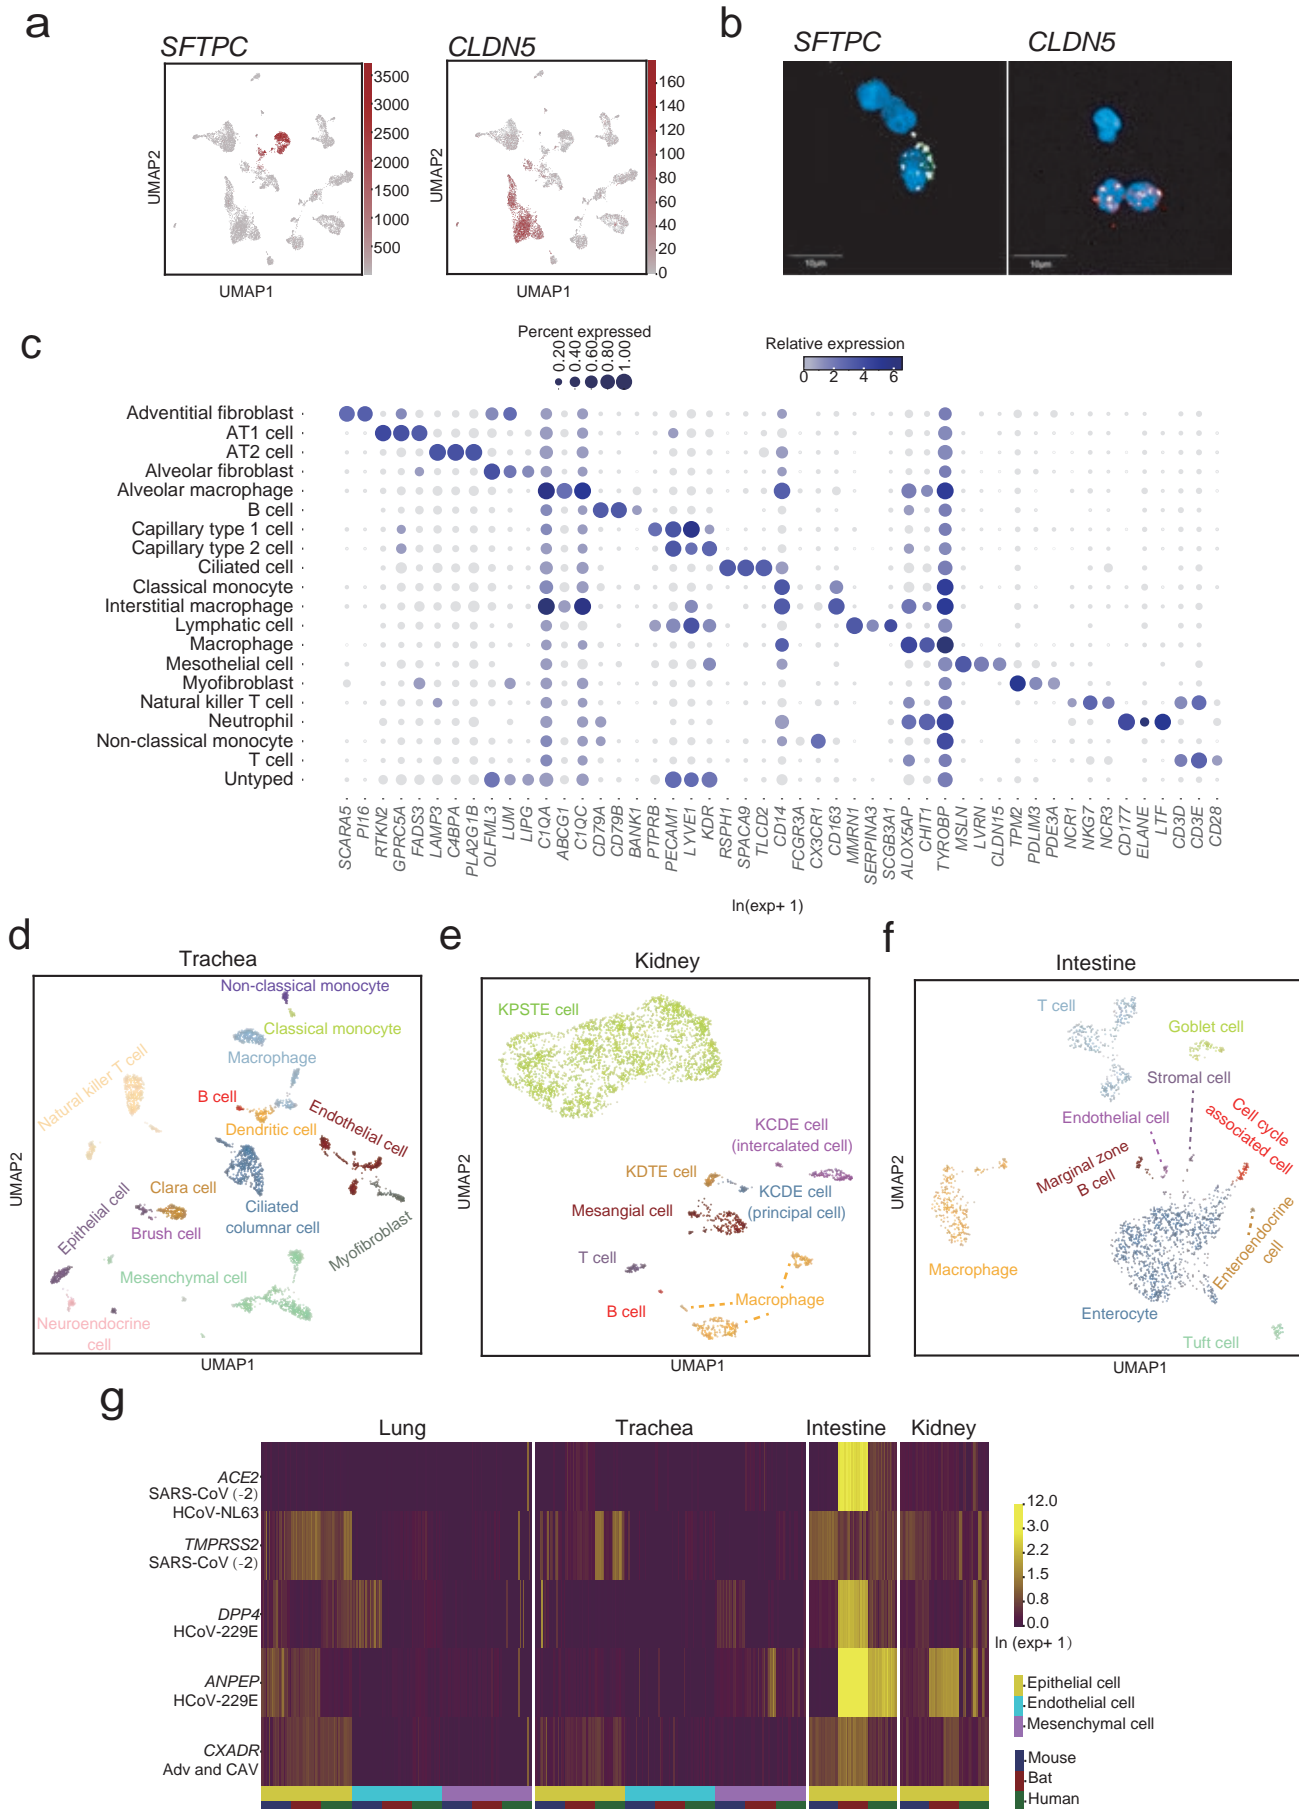



# Extended Data Figure 3. The known human viral receptors genes expressed in

bat across the cell types. Dot plots of expression for viral receptor genes in featured

cell types. The size of the dot encodes the percentage of cells within a cell type in which that marker was detected, and the color encodes the average expression level.

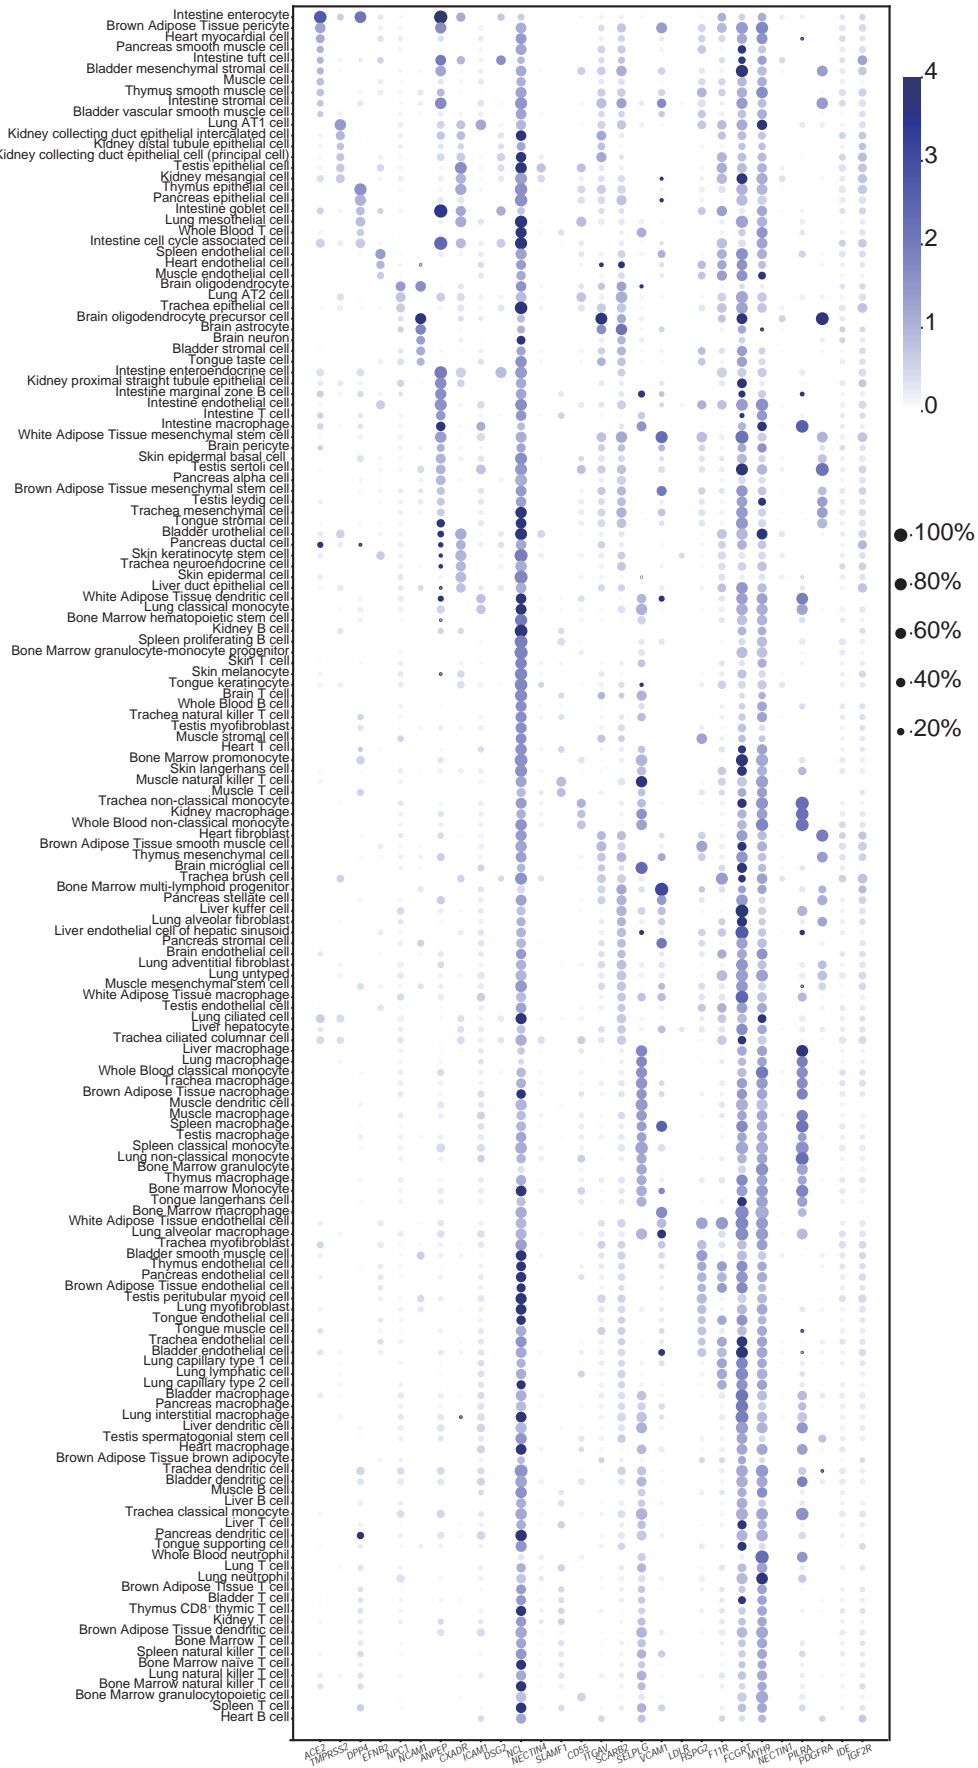

# Extended Data Figure 4. Summary of functional properties of various T cell clusters. a, Heatmap of

bioRxiv preprint doi: <https://doi.org/10.1101/2020.06.30.175778>; this version posted June 30, 2020. The copyright holder for this preprint (which was not certified by peer review) is the author/funder. All rights reserved. No reuse allowed without permission.

unique signature genes for thirteen T cell clusters. Selective specifically expressed genes are marked

alongside. b, UMAP plots of expression levels of selected genes in different clusters indicated by the coloured oval corresponding to Figure 3a. c, Overview of T cell cluster characteristics. d, The number of activated T cells and naïve T cells in different tissue.

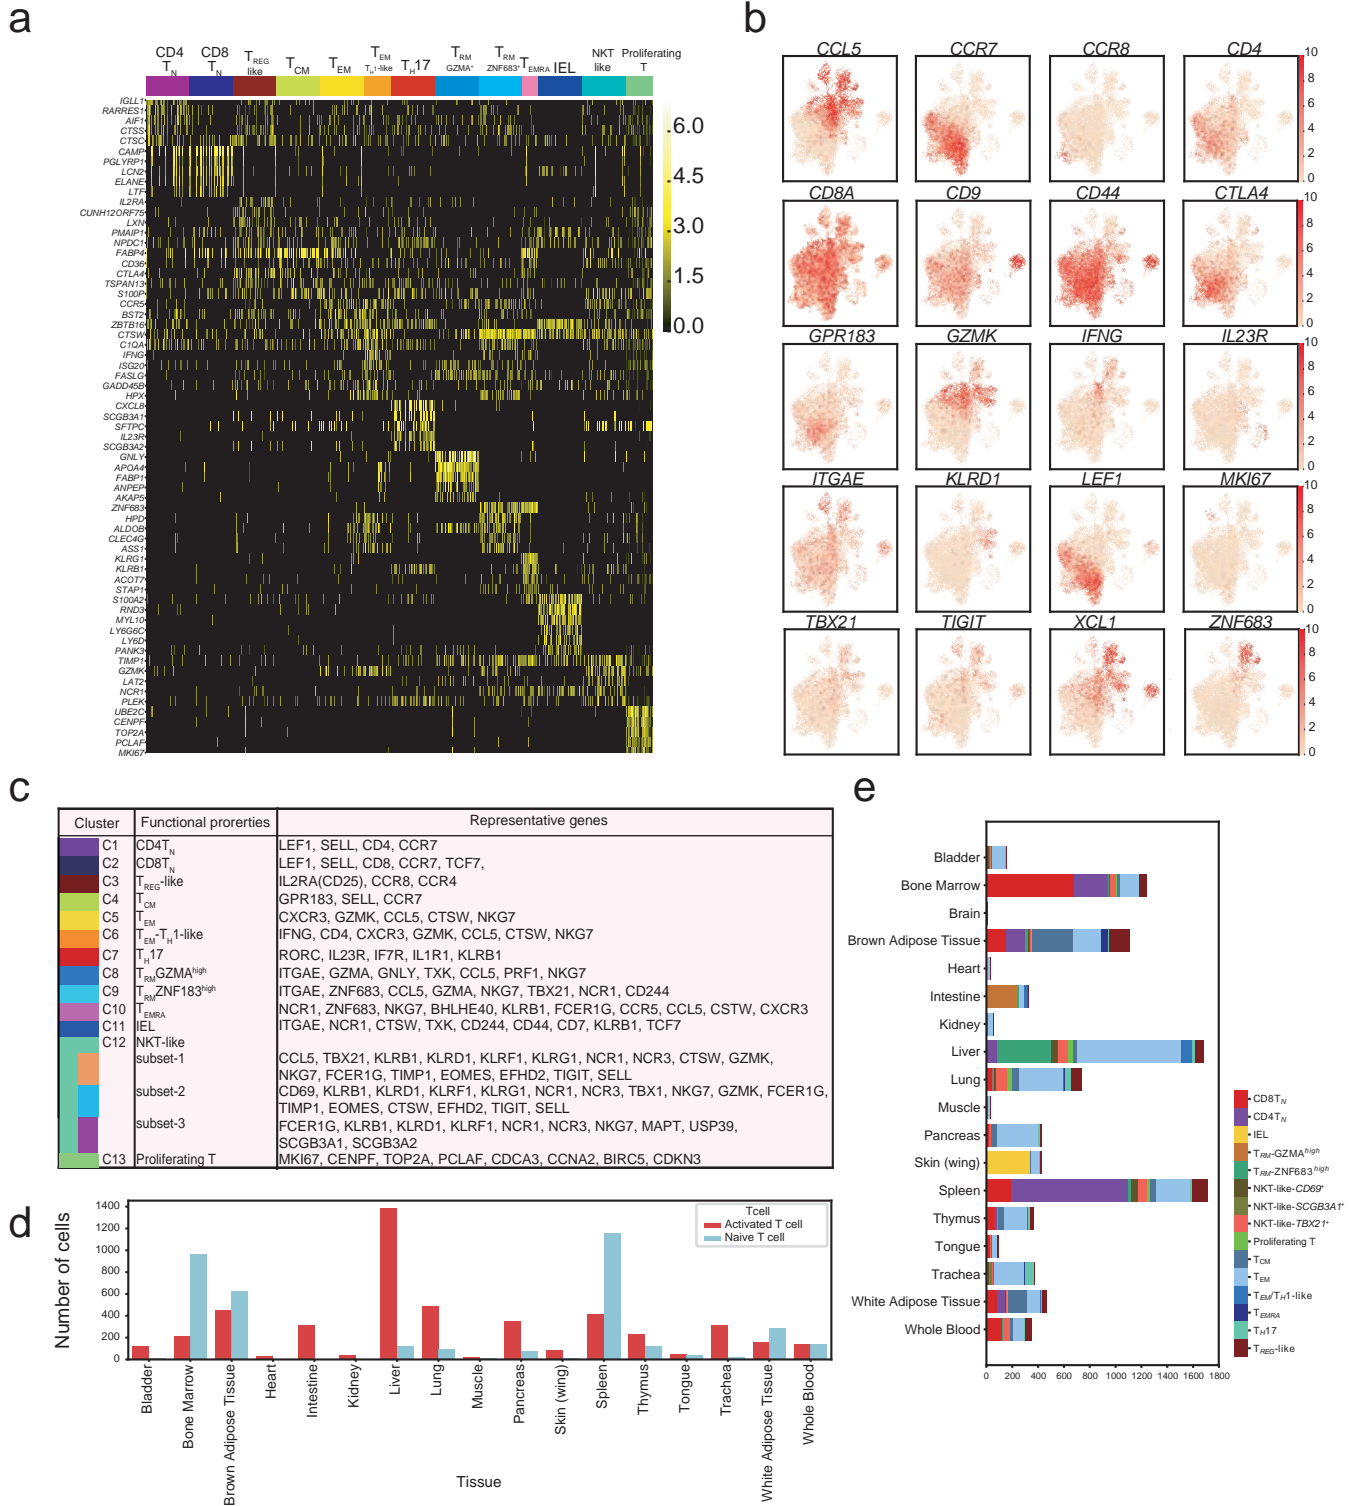

# Extended Data Figure 5. Analysis of mononuclear phagocytes.

a, UMAP visualization of mononuclear phagocytes from which was not defined by cell type but by the organ of origin. All cells received no reusults without parameters. The functional description of each cluster is determined by the gene expression characteristics of each cluster.

b, Dot plot visualization of each cell type and selected marker gene. The size of the dot encodes the percentage of cells within a cell type in which that marker was detected, and the color encodes the average expression level.

c, Tissue preference of mononuclear phagocytes estimated by proportion based on 10x data.

d, Gene ontology analysis of macrophage with high expressions of *CCL26*, *CD300E*, *CSF1R*, *LYVE1* and *SPIC*.

d, Gene ontology analysis of macrophage with high expressions of *CCL26*, *CD300E*, *CSF1R*, *LYVE1* and *SPIC*.

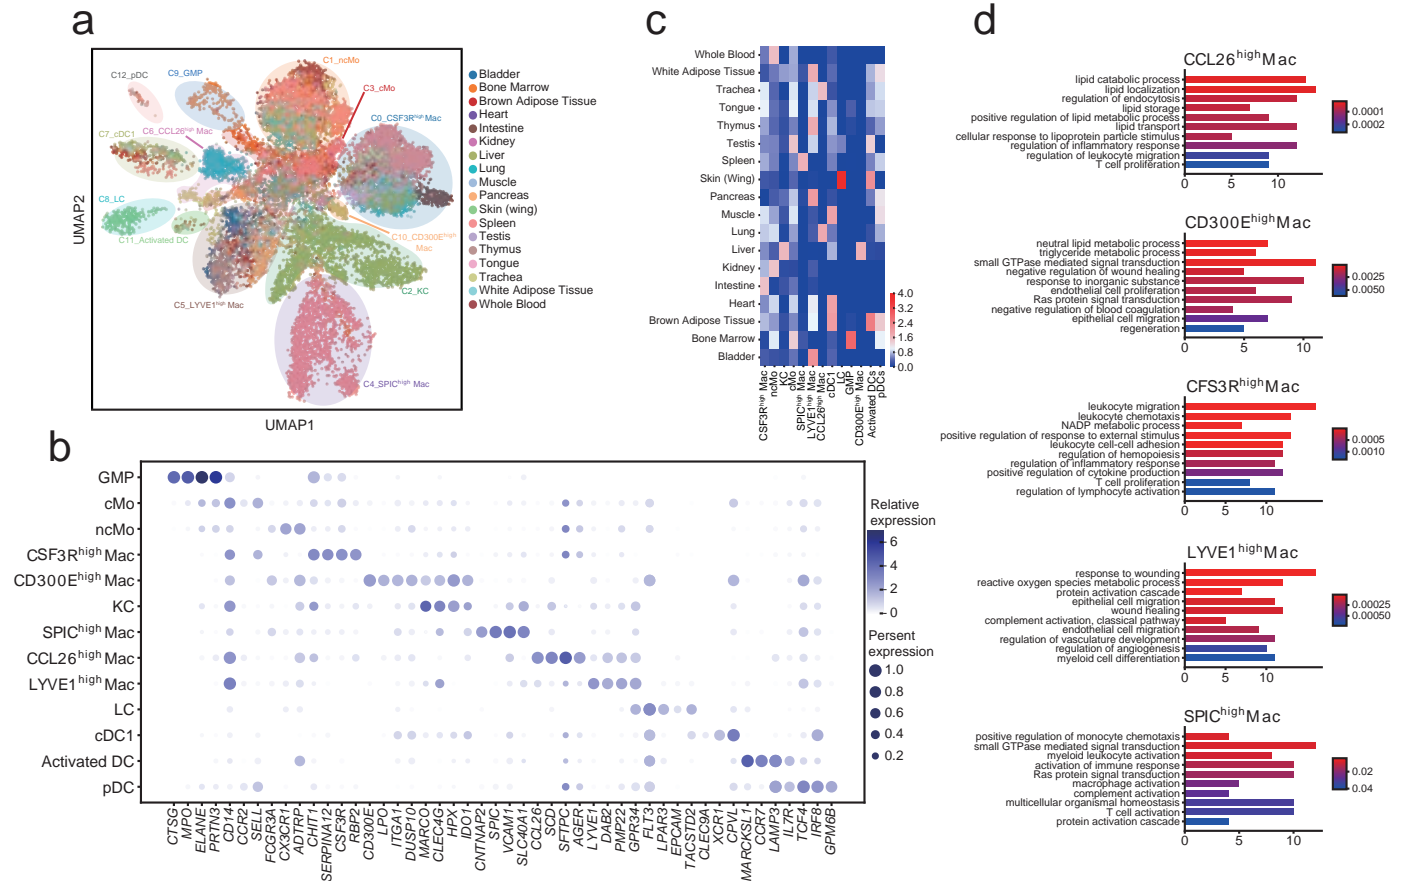



**Extended Data Figure 6. Analysis of innate immune gene mRNA expression in Chinese horseshoe bat**  
 bioRxiv preprint doi: <https://doi.org/10.1101/2020.06.30.175778>; this version posted June 30, 2020. The copyright holder for this preprint (which was not certified by peer review) is the author/funder. All rights reserved. No reuse allowed without permission.

**tissues.** Tissue mRNA expression levels of RIG-I, MDA5, TLR3, TLR7, TLR8, TLR9, IRF3, IRF7, IFN $\alpha$ ,

IFN $\beta$ , IFN $\omega$  and IFN $\gamma$  were determined by qRT-PCR and normalised relative to GAPDH. Error bars

represent standard deviation.

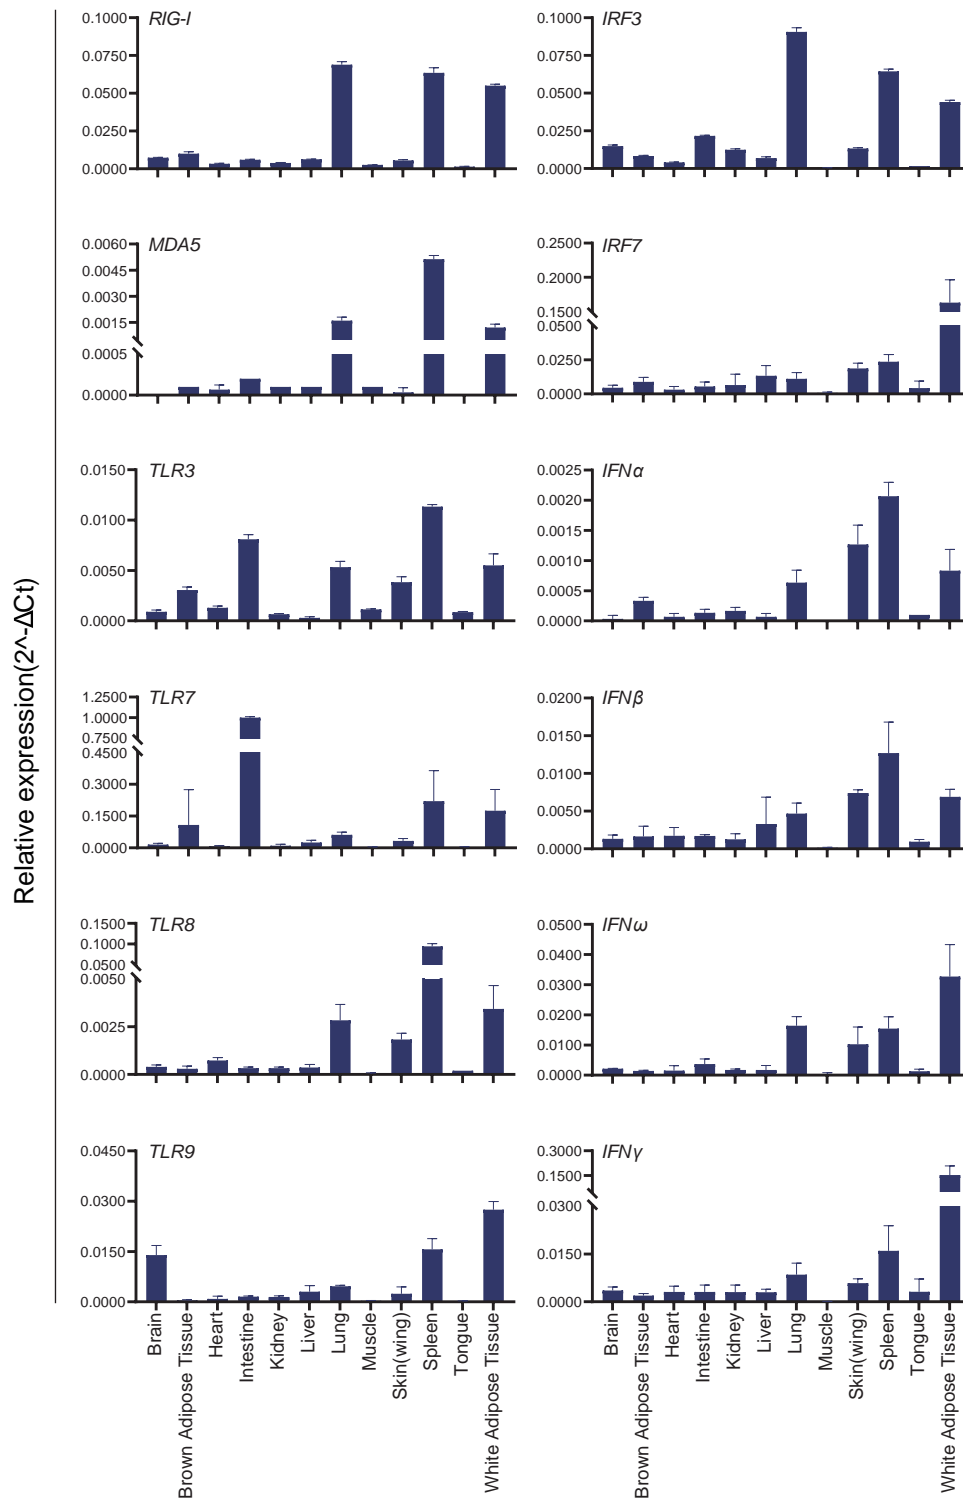

Source: https://biorxiv.org/content/10.1101/2020.06.30.175778v1.full.pdf
